1 **RESEARCH ARTICLE**

2 **Unravelling the puzzle of anthranoids metabolism in living plant cells using**  
3 **spectral imaging coupled to mass spectrometry**

4

5 Quentin Chevalier<sup>a,b,1</sup>, Jean-Baptiste Gallé<sup>a</sup>, Nicolas Wasser<sup>a</sup>, Valérie Mazan<sup>c</sup>,  
6 Claire Villette<sup>b</sup>, Jérôme Mutterer<sup>b</sup>, Maria M. Elustondo<sup>d</sup>, Nicolas Girard<sup>a</sup>, Mourad  
7 Elhabiri<sup>c</sup>, Hubert Schaller<sup>b</sup>, Andréa Hemmerlin<sup>b</sup>, Catherine Vonthron-Sénécheau<sup>a</sup>

8 <sup>a</sup> Laboratoire d'Innovation thérapeutique, Centre National de la Recherche  
9 Scientifique-Université de Strasbourg, Illkirch, France, F-67401 Cedex

10 <sup>b</sup> Institut de Biologie Moléculaire des Plantes, Centre National de la Recherche  
11 Scientifique-Université de Strasbourg, Strasbourg, France, F-67084 Cedex

12 <sup>c</sup> Laboratoire d'Innovation Moléculaire et Applications, Centre National de la  
13 Recherche Scientifique-Université de Strasbourg-Université de Haute Alsace,  
14 Strasbourg, France, F-67087 Cedex

15 <sup>d</sup> SUPINFO École des Experts des Métiers de l'Informatique, Strasbourg, France,  
16 F-67004 Cedex

17 <sup>1</sup> Address correspondence to [qchevalier67@gmail.com](mailto:qchevalier67@gmail.com)

18

19 **Short title:** Anthranoids Metabolism

20

21 The author(s) responsible for distribution of materials integral to the findings  
22 presented in this article in accordance with the policy described in the  
23 Instructions for Authors ([www.plantcell.org](http://www.plantcell.org)) is: Quentin Chevalier  
24 ([qchevalier67@gmail.com](mailto:qchevalier67@gmail.com))

25

26

## 27 **Abstract**

28 Vismione H (VH) is a fluorescent prenylated anthranoid produced by plants from  
29 the Hypericaceae family, with antiprotozoal activities against malaria and  
30 leishmaniosis. Little is known about its biosynthesis and metabolism in plants or  
31 its mode of action against parasites. When VH is isolated from *Psorospermum*  
32 *glaberrimum*, it is rapidly converted into madagascine anthrone and  
33 anthraquinone, which are characterized by markedly different fluorescent  
34 properties. To locate the fluorescence of VH in living plant cells and discriminate  
35 it from that of the other metabolites, an original strategy combining spectral  
36 imaging (SI imaging), confocal microscopy and non-targeted metabolomics using  
37 mass spectrometry, was developed. Besides VH, structurally related molecules  
38 including madagascine, emodin, quinizarin as well as lapachol and fraxetin were  
39 analyzed. This strategy readily allowed a spatiotemporal characterization and  
40 discrimination of spectral fingerprints from anthranoids-derived metabolites and  
41 related complexes with cations and proteins. In addition, our study validates the  
42 capability of plant cells to metabolize VH into madagascine anthrone,  
43 anthraquinones and unexpected metabolites, leading to new hypotheses on the  
44 metabolism of anthranoids in plants.

45

## 46 **INTRODUCTION**

47 The plant kingdom is a source of ~200.000 identified specialized metabolites of  
48 which, ~10.000 are phenolic compounds also called polyphenols. Many of these  
49 metabolites are used as ingredients in the pharmaceutical, cosmetics and agri-  
50 food industries on account of their diverse bioactive properties (Tissier et al.,  
51 2014). Anthranoids form a large class of polyphenols including anthraquinones,  
52 anthrones and bianthrones characterized by anthracene-based structures with  
53 various degree of oxidations and conjugated with sugars and/or prenyl groups  
54 (Mazimba et al., 2013). The biological action of well-studied anthraquinones  
55 requires specific structural groups. For instance, in the case of emodin (emo),  
56 hydroxyl groups at position 1 and 8 of the anthracene ring (Figure 1A) are  
57 mandatory for its purgative properties (Dong et al., 2016; Srinivas et al., 2007).

58 Vismione H (VH) (Figure 1A) is a prenylated anthranoid, generating significant  
59 interest due to promising antimalarial and antileishmanial activities (François et  
60 al., 1999; Gallé, 2015). Chemical inventories of botanical resources, structural  
61 elucidation and biological activities of natural products like VH allowed a  
62 compilation of comprehensive repositories for potential drugs. Still, fundamental  
63 questions about their biosynthesis *in planta*, their molecular targets for biological  
64 activities and their metabolization in cells into potentially active derivatives  
65 remain unsolved.

66 In plants, anthranoids are biosynthesized through two distinct pathways: the  
67 polyketide pathway occurs in the Rhamnaceae, Fabaceae, Aloeaceae,  
68 Polygonaceae families, while the shikimate/*o*-succinylbenzoic acid pathway in  
69 Rubiaceae (Han et al., 2001). Recently, genome mining identified new  
70 candidates for anthraquinones biosynthesis enzymes in *Senna tora* plants (Kang  
71 et al., 2020). Anthranoid metabolism has also been reported in mushrooms  
72 belonging the *Cortinarius* genus and in *Aspergillus nidulans* (Gill, 2001; Chiang et  
73 al., 2010). These data suggest that O-methylation, oxidation, hydroxylation,  
74 dimerization, glycosylation may be enzyme-catalyzed, while other modifications  
75 could result from chemical reactions such as tautomerization, photoisomerization  
76 and photochemical hydroxylation (Fain et al., 2006; Furumoto and Jindai, 2008;  
77 Elkazaz and Jones, 2010). Under oxidative conditions like in DMSO, the VH  
78 isolated from *Psorospermum glaberrimum* spontaneously degrades into anthrone  
79 form, which is then oxidized into its madagascine (Mad) anthraquinone form or  
80 alternatively dimerized into bianthrones (Gallé, 2015).

81 Within the entire UV-Vis. spectrum, more than 300 naturally occurring fluorescent  
82 compounds have been reported with quantum yields ranging from 0.01% to  
83 100% *in vitro* (Duval and Duplais, 2017). Anthranoids exhibit distinct  
84 fluorescence properties in spite of their chemical structure similarities, this  
85 allowing their differentiation by spectral analysis. In fact, the number and position  
86 of substituents, especially hydroxyl groups impact the physico-chemical (*i.e.*,  
87 protonation) and fluorescence properties of anthranoids (Duval and Duplais,  
88 2017). The acetyl vismione D emits green fluorescence ( $\lambda_{Em} = 534$  nm) in

89 methanol with a low quantum yield of about 2% (Gallé, 2015), whereas  
90 anthrones/anthranols emit light at a blue wavelength ( $\lambda_{Em} = 458$  nm) in alcohols  
91 and a strong yellow-green fluorescence in water ( $\lambda_{Em} = 539$  nm) (Fujii et al.,  
92 1997). In regards to anthraquinones such as quinizarin (Qui) (Figure 1A) or  
93 hypericin, both fluoresce in the orange to far red window (570-675 nm) with  
94 quantum yield up to 30 % (Fujii et al., 1997; Rossi et al., 2010; Verebova et al.,  
95 2016; Duval and Duplais, 2017). Overall, the specific fluorescence properties of  
96 VH, anthrone and anthraquinone forms have never been exploited in integrative  
97 biochemical approaches, especially to elucidate their biosynthesis, metabolism,  
98 cell compartmentation and bioactivity in living cells.

99 Spectral imaging (SI imaging) enables the simultaneous detection of emitted  
100 fluorescence in multiple independent channels with a resolution < 10 nm/channel  
101 (Figure 1B). Auto-fluorescent phenolic compounds such as simple phenols,  
102 vanillin and mangiferin were observed by SI imaging indeed (Conéjéro et al.,  
103 2014; Talamond et al., 2015). Here, SI imaging combined with high-resolution  
104 mass spectrometry was implemented to track VH, related anthranoids (Mad,  
105 Emo, Qui) and compared to a prenylated naphthoquinone lapachol (Lap) in  
106 tobacco BY-2 cells (Figure 1A and 1B). Tobacco cells were chosen as a model  
107 because it is inexpensive, safe, easy to handle and free of auto-fluorescent  
108 compounds under standard conditions (Nagata et al., 1992). Fraxetin (Fra) was  
109 used as a positive control because its fluorescence and metabolism are reported  
110 in *Arabidopsis* and tobacco BY-2 cells (Tsai et al., 2018; Lefèvre et al., 2018). To  
111 faithfully characterize the molecules on the basis of their fluorescence observed  
112 by SI imaging, we performed a spectrofluorometric analysis of pure compounds in  
113 solution as a reference (Figure 1B). This comparison allowed for the identification  
114 of natural products fluorescence signals within different cell compartments at a  
115 single time point. Combined with non-targeted metabolomics (*UPLC-HRMS/MS*)  
116 of treated tobacco cells, providing unique and accurate annotations of fluorescent  
117 metabolites (Figure 1C), this elegant photobiochemistry approach offer a fresh  
118 eye on the fate of the antimalarial agent vismione H in living plant cells.

119

## 120 RESULTS

### 121 pH influences the spectral properties of compounds in solution.

122 pH values and composition in salts differ in plant sub-cellular compartments,  
123 hinging on cell type, the developmental stage and environment (Binzel et al.,  
124 1988; Carden et al., 2003). As the intracellular pH in plant cells ranges from 5 in  
125 the primary vacuole, up to 8 in the mitochondrial matrix and peroxisomes (Shen  
126 et al., 2013; Martinière et al., 2013), we have investigated in detail the  
127 photophysical properties of anthranoids and coumarins, whose fluorescence is  
128 under physiochemical control. It is noteworthy that all studied compounds  
129 showed at least two main absorption bands, one with high absorptivity at  
130 wavelengths below 300-320 nm and another less intense band at much lower  
131 energies (from 350-600 nm, see Supplemental Figure S1 and Table S1). In all  
132 examined systems, a significant bathochromic shift of the absorption lying at  
133 lower energies was observed upon increasing pH. In contrast, a hypochromic  
134 shift of the main absorption band and the emergence of a weak absorption band,  
135 centered at about 500 nm under basic conditions, was observed for VH (see  
136 Supplemental Figure S1A to S1C). As reported for other polyphenols (Friedman  
137 and Jürgens, 2000; Giusti and Wrolstad, 2001), these results showcase the  
138 impact of the moderate acidity and the associated hydroxyl deprotonation of the  
139 investigated polyphenols on their respective absorption spectral characteristics.  
140 In addition, the second absorption centered at 350-600 nm is appropriate to  
141 SImaging methodology settings and to those of most confocal microscopes.

142 Among the six compounds studied, with the exception of Lap (see Supplemental  
143 Figure S2F), all compounds emitted fluorescence when excited between 350-520  
144 nm (Figure 2). In an organic solvent such as ethyl acetate, VH did not emit  
145 fluorescence as compared to anthraquinones (see Supplemental Figure S2A to  
146 S2D), whereas Fra could only be excited by  $\lambda < 330$  nm (see Supplemental  
147 Figure S2E). Still, in saline ethanolic solution at pH 2 (*i.e.*, fully protonated and  
148 neutral species), VH and anthraquinones were found to be fluorescent and their  
149 absolute quantum yields  $\Phi_F$  ranged from 0.4 to 15.1% (Table 1, Figure 2A to 2E).  
150 Surprisingly, although Mad only differs from the Emo by the prenylated C3-OH

151 group (Figure 1A), its absolute quantum yield  $\Phi_F = 4.8\%$  was found to be 10  
152 times higher than that of Emo  $\Phi_F = 0.4\%$ . The 1,4-dihydroxyanthraquinone Qui  
153 was found to be the most fluorescent anthraquinone with a  $\Phi_F = 15.1\%$ . These  
154 results indicate that the number and position of hydroxyl groups as well as other  
155 types of substitutions (e.g., prenyl group on position 3 for Mad) on  
156 anthraquinones contribute to the brightness of their fluorescence emission. In  
157 addition, anthraquinones show a drastic loss of their fluorescence emission  
158 intensity (see Supplemental Figure S2B to S2D) when the pH value is higher  
159 than the  $pK_{a1}$  (i.e., monodeprotonated species, see Supplemental Table S1), and  
160 *vice versa* for Fra or VH (catechol for Fra or naphthalene-1,8-diol for VH, see  
161 Supplemental Figure S2A and S2E). Nonetheless, subsequent increase of pH to  
162 12 and higher lead to the progressive loss of Fra and VH fluorescence (see  
163 Supplemental Figure S2A and S2E). It can be speculated that the former likely  
164 promoted VH and Fra degradation into other compounds by lactone ring opening  
165 or anthraquinone formation from VH as previously described in DMSO (Hlasiwetz  
166 and Grabowski, 1867; Cameron et al., 1976; Gallé, 2015). Interestingly, the  $\lambda_{Em}$   
167 measured for VH in  $NH_4HCO_3$  and  $Na_2B_4O_7$  buffers at pH 10 were found to be  
168 bathochromically shifted from 481 to 532 nm ( $LNH_4^+$   $\Phi_F = 23.9\%$ ) and 533 nm  
169 (LB  $\Phi_F = 31\%$ ), respectively (Table 1, Figure 2B, see Supplemental Figure S3A).  
170 With  $Na_2B_4O_7$  buffer, VH is therefore strongly emitting as reported for anthranol in  
171 the Schouteten reaction with  $Na_2B_4O_7$  (Fujii et al., 1997). Similarly, Fra  $\lambda_{Em}$  was  
172 492 nm (LB  $\Phi_F = 1.1\%$ ) and 481 nm ( $LNH_4^+$   $\Phi_F = 7.7\%$ ) in  $NH_4HCO_3$  (Table 1,  
173 Figure 2F, see Supplemental Figure S3B). These results indicate that in cellular  
174 environments with acidity ranging from 4 to 7.8, all compounds except Lap and  
175 Fra would emit fluorescence if excited at  $\lambda_{Ex}$  ranging from 392 to 480 nm. As far  
176 as Fra and VH are concerned, the distinct photophysical properties of the LB and  
177  $LNH_4^+$  characterized species support the fact that these two compounds are  
178 likely able to chelate boron as already reported for  $Mg^{2+}$  or  $Fe^{2+}$  with Fra and  
179 anthraquinones (Sedaira et al., 1998; Tsai et al., 2018), but also ammonium. In  
180 this context, we have carefully investigated the influence of metals ( $Ca^{2+}$  and  
181  $Mg^{2+}$ ) and the BSA model protein chelation on the VH emission properties.



182

183 **Metal and protein chelations influence VH fluorescence properties.**

184  $\text{Ca}^{2+}$  and  $\text{Mg}^{2+}$  were selected for complexation studies not only because of their  
185 abundance in plant cells, but also for their key roles in cell structure and  
186 physiology such as signaling pathways or the water splitting complex of  
187 photosystems (Hepler, 2005; Waters, 2011; Guo et al., 2015). BSA was selected  
188 as a protein model as it has already been used for protein chelation assays with  
189 other fluorescent compounds (Duval et al., 2020). Thus, we evaluated the  
190 absorption (26  $\mu\text{M}$  VH) and fluorescence (2.6  $\mu\text{M}$  VH) properties of VH in  
191 EtOH/water 1:1 v/v containing 0.1 M of NaCl in the presence of  $\text{Mg}^{2+}$  or  $\text{Ca}^{2+}$ . As  
192 BSA precipitated under these experimental conditions, the protein complexation  
193 studies were performed only in water. Accordingly, VH chelates both  $\text{Mg}^{2+}$  and  
194  $\text{Ca}^{2+}$  with a comparable affinity (Figure 3, see Supplemental Figure S4 and  
195 Figure S5). From the UV-Vis. absorption titrations,  $\log K_{\text{VHM}}$  values of  $2.31 \pm 0.07$   
196 and  $2.24 \pm 0.06$  respectively, were calculated and indicated that substantial  
197 amounts of VH-Ca or VH-Mg complexes can be formed within the cells. In both  
198 cases, about 70% of VH (26  $\mu\text{M}$ ) complexation was achieved with 6 mM of  $\text{CaCl}_2$   
199 or  $\text{MgCl}_2$ . Although VH displays similar binding strength with these metal ions,  
200 the absorption data pointed out different binding modes (see Supplemental  
201 Figure S4 and Figure S5). Marked spectral differences observed in the case of  
202  $\text{Ca}^{2+}$  as compared to  $\text{Mg}^{2+}$  assert divergent coordination preferences. As  
203 reported, carboxylates preferentially act as bidentate binders with  $\text{Ca}^{2+}$  and as  
204 monodentate ligands with  $\text{Mg}^{2+}$  in proteins (Dudev and Lim, 2004). This property  
205 could explain our absorption data with VH acting as bidentate ligand with  $\text{Ca}^{2+}$  ( $\beta$ -  
206 hydroxy-ketone binding unit leading, see Supplemental Figure S1A and S1B),  
207 while preferentially coordinating  $\text{Mg}^{2+}$  with monodentate binding unit mode  
208 (phenolate unit). Fluorescence analysis of VH-Ca and VH-Mg complexes in  
209 solution confirmed the impact of chelation on photophysical properties. The  
210 maximum of emission  $\lambda_{\text{Em}}$  for VH-Ca and VH-Mg ( $549 \pm 1$  nm) complexes was  
211 found to be higher than that of the VH LB or  $\text{LNH}_4^+$  species ( $532 \pm 1$  nm) (Table  
212 1). Nonetheless, the  $\Phi_{\text{F}}$  of VH-Ca (19.8%) and VH-Mg (18.6%) complexes were

213 substantially lower than that of VH LB (31%) species, but still much higher than  
214 the neutral species (3.7% for VH LH<sub>2</sub>).

215 We then evaluated the binding strength of VH and Fra with the BSA protein  
216 model, both by absorption and emission means (see Supplemental Figure S6A,  
217 S6B, S6E and S6F). VH and Fra were found to strongly interact with BSA, with  
218 stability constants  $\log K_{\text{VH-BSA}}$  and  $\log K_{\text{Fra-BSA}}$  values of  $5.3 \pm 0.2$  and  $5.7 \pm 0.3$   
219 (see Supplemental Figure S7), respectively. This suggests that VH and Fra  
220 would interact mainly with proteins rather than with divalent metal ions *in cellula*.  
221 VH chelates BSA protein with a weak alteration of the absorption properties as  
222 seen previously with Mg<sup>2+</sup> (Figure 3B, see Supplemental Figure S7A and S7B),  
223 while the absorption properties of Fra were significantly altered (see  
224 Supplemental Figure S7E and S7F). The  $\lambda_{\text{Em}}$  of VH LBSA fluorescence spectrum  
225 corresponded to 517 nm with  $\Phi_{\text{F}} = 23.5\%$ , close to that of VH LNH<sub>4</sub><sup>+</sup> species  
226 (Table 1, see Supplemental Figure S3C). Similar results were found with Fra-  
227 BSA (Table 1, see Supplemental Figure S3D, Figure S6F and S6G). It can be  
228 proposed that electrostatic interactions with ammonium residues such as those  
229 found in lysine or arginine, allows complexation of VH and Fra with proteins. In  
230 contrast, Emo and Qui emissions were almost unaffected in the presence of BSA  
231 (see Supplemental Figure S6C, S6D, S6G and 6H), as reported for complexes  
232 with DNA (Verebova et al., 2016). Overall, although neutral VH and Fra LH<sub>2</sub> with  
233 low  $\Phi_{\text{F}}$  seemingly predominate at intracellular pH, our results suggest that  
234 interactions with endogenous metal ions or proteins might improve/modulate their  
235 fluorescence properties *in cellula*.

236

237 **Fluorescent anthranoids metabolization and transport *in cellula* by spectral**  
238 **imaging.** To characterize the fluorescence *in cellula*, we compared the reference  
239 emission spectra obtained from our spectrofluorimetric analysis to those  
240 measured by SImaging in solution and in living BY-2 cells. SImaging methods  
241 were used to discriminate mixed fluorescent signals from the studied compounds  
242 in solution and in BY-2 cells with a special focus on vismione H (blue to green-  
243 yellowish emission) and related anthraquinones (yellow to red emission) (Figure



244 1A). With respect to the photophysical data, two different settings have been  
245 selected for the excitation and detection of fluorescence using SImaging:  $\lambda_{Ex} =$   
246 405 nm ( $\lambda_{405}$ ) with emission spectra range from 415 to 664 nm, and  $\lambda_{Ex} = 488$  nm  
247 ( $\lambda_{488}$ ) with emission spectra range from 495 to 664 nm. The fluorescence data  
248 obtained by SImaging on pure compounds in solution at  $\lambda_{405}$  and  $\lambda_{488}$  fit well with  
249 those obtained by the spectrofluorimetric approach (Figure 2 and Figure 3, see  
250 Supplemental Figure S3). However, some variations can be observed such as a  
251 decrease in the intensity of the shoulder of the Emo LH<sub>3</sub> at 575 nm or a shift from  
252 484 to 503 nm for the VH LH<sub>2</sub> or from 492 to 521 nm for the Fra LB. These  
253 discrepancies could be related to differences in resolution, glass support or  
254 optical path between SImaging (9 nm, glass microscope slide, 1 mm) and  
255 spectrofluorimetry (1 nm, quartz cell, 1 cm). In addition, the hydrophobic  
256 character of Mad was appreciated by the observation of aggregates at 1 mM  
257 Mad in hydro-alcoholic solution at pH 2 (see Supplemental Figure S8). Although  
258 the  $\Phi_F$  of Mad is higher than that of Emo, its lower solubility results in a lower  
259 fluorescence signal, which reduces the quality of spectra recorded at  $\lambda_{488}$  or  $\lambda_{405}$   
260 for Mad in solution. To note, this solubility problem was also observed in the cell  
261 culture medium after treatments, leading to the formation of aggregates still  
262 present after 18 h.

263 *In vivo*, very low fluorescence was detected in control (Ctr) and Lap-treated cells  
264 (Figure 4F, see Supplemental Figure S9 and Figure S10F). We define these  
265 signals as the autofluorescence threshold in tobacco BY-2 cells. For all other  
266 compounds, the emergence of fluorescence was clearly observed in treated BY-  
267 2 cells (5 min) being stable after 18 h treatments with either 25  $\mu$ M (Figure 4A to  
268 4E) or 50  $\mu$ M (see Supplemental Figure S10A to S10E). Overall, excitation at  $\lambda_{405}$   
269 resulted in a stronger fluorescence signal than at  $\lambda_{488}$ , but the opposite effect was  
270 observed with Qui- (Figure 4B) and Mad-treated cells (Figure 4D). As evidenced  
271 by our spectral analysis, only Fra-treated cells did not display fluorescence at a  
272  $\lambda_{488}$  excitation (Figure 4E). Except for VH, all spectra recorded at 5 min after  
273 treatment are very similar (same  $\lambda_{Em}$  and shape) and independent of  $\lambda_{Ex}$  (Figure  
274 4B-4E, see Supplemental Figure S10). PCA of the normalized average spectra

275 support the idea that the emission spectrum observed at  $\lambda_{488}$  in VH-treated cells  
276 shares similarities with those measured with Qui and especially Mad, but not with  
277 spectra found in Emo-treated cells (Figure 5B, see Supplemental Figure S11B to  
278 Figure S13B). Besides, the emission maxima observed in VH and Mad-treated  
279 cells (mostly in vesicular bodies) following excitation at  $\lambda_{488}$ , were centered at 539  
280 nm and 575 nm. Even though the emission spectra recorded for VH- and Mad-  
281 cells share similarities with that of Qui-treated cells, the maximum of emission for  
282 Qui-treated cells was centered at 575 nm. These results strongly suggest that  
283 within the first minutes, VH and Mad lead to similar anthraquinones differing from  
284 those produced in both Emo- and Qui-treated cells. Interestingly, the  
285 fluorescence emission detected was usually observed first in the cytoplasm (see  
286 Supplemental Figure S14), and after 5 min in additional structures such as Golgi  
287 bodies (see Supplemental Figure S15), lipid droplets (see Supplemental Figure  
288 S16) and the ER (see Supplemental Figure S17). Specifically for Fra-treated  
289 cells excited at  $\lambda_{405}$ , a fluorescence emission was observed in the nucleus.  
290 Therefore, molecules are well absorbed by BY-2 cells and diffuse in different cell  
291 compartments following their polarity. The difference of shape and intensity  
292 between spectra collected in VH-treated cells suggests that at  $\lambda_{405}$  the  
293 monodeprotonated or complexed VH is detected in the cytoplasm and the ER,  
294 while at  $\lambda_{488}$  anthraquinones are predominantly observed in vesicular bodies  
295 such as lipid droplets and some Golgi bodies.

296 After 18 h, at  $\lambda_{488}$  or  $\lambda_{405}$  slight variations were detected in fluorescence  
297 intensities. In particular for anthranoids, it was found that their localization and  
298 emission spectra did not change significantly over time. Nevertheless, at  $\lambda_{405}$ , the  
299 shape of the emission spectrum in Mad-treated cells was found to be closely  
300 related to that of VH (Figure 4A and 4D). Also, other treatments have been  
301 associated either to the appearance of a new fluorescence emission signal in the  
302 primary vacuole (Figure 4A to 4C, see Supplemental Figure S10A to S10C), or to  
303 the translocation of an identical fluorescence signal from the nucleus into the  
304 primary vacuole as seen in Fra-treated cells (Figure 4E, see Supplemental  
305 Figure S10E). These results were further validated by a PCA analysis of the

306 normalized average spectra (Figure 5C and 5D, see Supplemental Figure S11C,  
307 S11D and Figure S13C, 13D), giving rise to clustering of fluorescence spectra  
308 according to putative structural similarities between the tested molecules in BY-2  
309 cells. For instance, at  $\lambda_{488}$  (Figure 5D), the normalized average spectra of  
310 anthranoids-treated cells clustered, indicating that anthraquinones fluorescence  
311 was observed in contrast to Ctr, Lap and Fra, which do not fluoresce under these  
312 conditions. In addition, normalized average spectra collected at  $\lambda_{405}$  (Figure 5C)  
313 and at  $\lambda_{488}$  (Figure 5D) within the cytoplasm, ER and vesicular bodies in VH and  
314 Mad-treated cells were found to be similar and even closer after 18 h (Figure 5C  
315 and D) than after 5 min (Figure 5A and B). Therefore, they clustered in the PCA  
316 analysis. Conversely, the Emo normalized average spectra are significantly  
317 different at  $\lambda_{405}$  (Figure 5C) and slightly less different at  $\lambda_{488}$  (Figure 5D).  
318 Taken together, these results strongly support that VH was transformed *in vivo*  
319 into anthraquinones with a structure closer to that of Mad than to that of Emo. In  
320 addition, PCA of standardized average spectra with excitation at 405 nm ( $\lambda_{405}$ )  
321 clearly confirmed the appearance of a new signal observed in the primary  
322 vacuole after 18 h treatment with VH-, Emo- and Qui-treated cells (Figure 5C),  
323 whereas it was not observed using excitation at 488 nm ( $\lambda_{488}$ ). The fluorescence  
324 detected in the primary vacuole is similar to that detected in the cytoplasm for  
325 Emo and Qui unlike VH, for which the fluorescence observed in the primary  
326 vacuole is significantly different from that measured in the cytoplasm, ER and  
327 vesicular bodies. As a partial conclusion, SImaging analyses allowed us to  
328 accurately track the fluorescence of VH, related anthranoids and the coumarin  
329 (*i.e.*, fraxetin Fra) compared to Lap which exhibits no particular fluorescence in  
330 living cells. Moreover, the new fluorescence spectra observed after 5 min and 18  
331 h supports the hypothesis that VH is metabolized into Mad anthraquinone-types  
332 *in vivo*. Interestingly, we detected signals at  $\lambda_{405}$  located in cell compartments  
333 whose acidity is below  $pK_{a1}$  values in Fra- and VH-treated cells (*i.e.*,  $pK_{a1} = 8.5$   
334 for Fra and  $pK_{a1} = 7.2$  for VH). According to fluorescence of Fra and VH in model  
335 solution (Table 1), only complexes and especially LBSA species emit strong  
336 fluorescence at neutral pH. Thus, the bright signal observed at  $\lambda_{405}$  after feeding

337 with VH and Fra strongly support that part of Fra and VH are complexed *in*  
338 *cellula* and/or metabolized into related fluorescent compounds.

339

#### 340 **Fra and methyl-Fra derivatives prevail to Fra-glycosylated forms.**

341 An increase in the polarity of given compounds typically results from their  
342 oxidation by oxygenases or glycosylation by glycosyltransferases. This  
343 metabolization enables then the sequestration of phenolic compounds into the  
344 primary cellular vacuole as described with Fra (Lefèvre et al., 2018; Stringlis et  
345 al., 2019). To identify metabolites of Fra, Qui, Emo, Mad and VH characterized  
346 by the fluorescence spectra detected by Slmaging, non-targeted metabolomics of  
347 methanolic extracts from treated and non-treated BY-2 cells was carried out  
348 using UPLC-HRMS/MS. The results were compared to a database including the  
349 reference compounds and related metabolites deduced from *in silico*  
350 biotransformation. In this regard, 54 metabolites absent in the control extracts  
351 were annotated according to *m/z* of the parent ion and isotopic profile as  
352 compared to references or putative catabolites. In addition, hypothetical isomers  
353 and/or conjugates were annotated according to MS/MS fragments. As it cannot  
354 be excluded that after separation a loss of conjugates occurred in the MS source,  
355 the metabolites with different retention times ( $R_t$ ) but similar *m/z* and MS/MS  
356 fragments were annotated as derivatives represented by putative isomers and/or  
357 conjugates.

358 All references except Lap (see Supplemental Figure S18D and Table S2) have  
359 been identified in corresponding methanolic extracts of BY-2 cells treated for 15  
360 min or 18 h (Figure 6, see Supplemental Figure S18A to S18C and Table S3 to  
361 Table S5). The coumarin mixture annotated in the methanolic extracts from Fra-  
362 treated cells (Figure 6A) consists of 12 tri-oxygenated forms distributed in Fra  
363 and its supposed isomers (F1-F3), six methylated (F4-F9) and three glycosylated  
364 forms (F14-F16). The remaining metabolites correspond to tetra-oxygenated  
365 coumarins including reduced sideretin and two derivatives (F10-F12) together  
366 with another methoxylated form (F13). After 15 min, Fra quickly forms the more

367 polar F2 derivative. Simultaneously, both compounds may have been methylated  
368 (F8, F9) or glycosylated (F15, F16).

369 After 18 h, Fra, methylated forms F8 and F9 were significantly reduced in  
370 contrast to F2 derivative and F15 or F16 glycosylated forms, remaining constant  
371 (Figure 6A). In addition, the Fra derivative F1 abundance was increased 7-fold  
372 after 18 h, and other new methylated (F4, F5), hydroxylated (F10) as well as  
373 glycosylated (F14) forms were 6 to 33-fold more abundant (Figure 6A, see  
374 Supplemental Figure S18A). Thus, the annotated metabolites are consistent with  
375 those reported for BY-2 cells treated for 60 min with 20  $\mu$ M of Fra (Lefèvre et al.,  
376 2018). Although the absolute quantitation was not performed, the Fra isomers or  
377 conjugates appeared to be a prevalent form for storage in the primary vacuole,  
378 while abundance of glycosylated derivatives did not significantly change over  
379 time. In comparison, Lefèvre et al. (Lefèvre et al., 2018) reported that 7 days-old  
380 BY-2 cells treated with Fra (20  $\mu$ M) accumulate 63% of glycosylated derivatives.  
381 The metabolomics and SImaging results suggest that the spectral fingerprint  
382 observed at  $\lambda_{405}$  after 5 min and 18 h Fra treatments corresponds to a mixture of  
383 more polar Fra related metabolites rather than Fra itself. With this respect, Fra is  
384 metabolized and translocated from the cytoplasm and the nucleus to the primary  
385 vacuole for storage/sequestration in BY-2 cells (Figure 4E, Figure 6A and 6D).  
386 However, it was noticed that each group is mostly represented by a metabolite  
387 with an intermediate  $R_t$  (F2, F6, F11, F11) (Figure 6A, see Supplemental Table  
388 S3). Although BY-2 cells tend to produce other forms with lower  $R_t$  (more polar),  
389 it can be speculated that the later cannot be over accumulated due to putative  
390 cytotoxic effects. This is supported by the accumulation of methylated forms after  
391 18 h, the latter being also reported to decrease negative effects of free hydroxyls  
392 from 1-hydroxycantoin-6-one in *Ailanthus altissima* (Osoba and Roberts, 1994).

393

#### 394 **Metabolization of VH into anthrones and anthraquinones.**

395 The metabolomic analyses of extracts isolated from anthranoids treated cells  
396 after 15 min and 18 h highlighted specificities. For instance, Qui (Q6) and five of

397 its derivatives (Q1-Q5) were found exclusively in Qui-treated cells extracts  
398 (Figure 6B, see Supplemental Table S4) while Emo-, Mad- and VH-treated cells  
399 shared a few common metabolites (Figure 6C, see Supplemental Table S5). We  
400 noted an absence of methylated, hydroxylated or glycosylated forms, which may  
401 be explained by the unusual 4-OH group of Qui found in traces as reported in  
402 *Cassia obtusifolia* extracts (Rossi et al., 2010). In contrast, most natural  
403 anthranoids are found to be hydroxylated at all other positions except the position  
404 2 associated to carboxylic acid progenitors (Gill, 2001). Accordingly, it can be  
405 speculated that Q1-Q5 are five isomers resulting either from a chemical  
406 tautomerization/isomerization or from redox processes (Fain et al., 2006;  
407 Batchelor-McAuley et al., 2011). Meanwhile, it cannot be excluded that 1-OH was  
408 removed and the position C5 or C7 hydroxylated as reported for Emo (Gill, 2001;  
409 Chiang et al., 2010). The specific detection of Qui in related methanolic cell  
410 extracts is consistent with its fluorescence detected by SImaging at  $\lambda_{488}$ .  
411 However, the non-targeted metabolomics pointed out that the Qui fluorescence  
412 detected in the cytoplasm, lipid droplets and some Golgi bodies may be related  
413 to Q1-Q5 derivatives too. In the absence of Q1-Q5 references, we were not able  
414 to confirm whether these derivatives or Qui contributed to the fluorescence  
415 observed and especially that in the primary vacuole ( $\lambda_{405}$ ). Thus, it can also be  
416 assumed that the latter would be originated from other non-annotated  
417 metabolites.

418 In VH-, Mad-, Emo-treated cells, the Emo (A8) and eight of its derivatives (A1-A7,  
419 A9) have been detected (Figure 6C, see Supplemental Table S5). In addition,  
420 five methylated (A10-A14), two hydroxylated (A15, A16), two methoxylated (A17,  
421 A18) and four glycosylated (A24-A27) Emo derivatives were significantly  
422 detected only in Emo-treated cells. Surprisingly, Emo and its A1-A6 derivatives  
423 were almost exclusive of Emo-treated cells and after 18 h the A1-A5 abundance  
424 significantly increased. In contrast, the Emo derivatives A7 and A9 were specific  
425 to Mad and VH-treated cells. This agrees with SImaging and PCA results  
426 obtained for Emo-treated cells at 5 min and 18 h. Indeed, the fluorescence  
427 observed mostly in the cytoplasm at  $\lambda_{405}$  and  $\lambda_{488}$  corresponds to a specific



428 spectral fingerprint of Emo and more likely to A6 content that is unchanged in our  
429 metabolomic data at both 15 min and 18 h. In contrast, it can be proposed that  
430 the fluorescence observed in the primary vacuole at  $\lambda_{405}$  after 18 h, is from a  
431 mixture of the most hydrophilic derivatives (A1-A5), glycosylated (A24, A25) or  
432 hydroxylated (A15, A16) forms, being significantly increased after 18 h as  
433 compared to 15 min (Figure 6C and 6D). Other metabolites such as VH (A23) as  
434 well as Mad anthrone and two putative isomers (A19-A21) were only detected in  
435 VH-treated cells, while Mad (A22) was found in VH and Mad-treated cells.

436

## 437 **DISCUSSION**

438 For years, the metabolism, biosynthesis and bioactivity of anthranoids were  
439 studied through chemical analysis of metabolites after feeding experiments with  
440 radiolabeled precursors (Gill, 2001), genome mining (Chiang et al., 2010; Kang  
441 et al., 2020) and bioassays (François et al., 1999; Gallé, 2015), respectively. Our  
442 study demonstrates that Slmaging is an additional sensitive and suitable tool for  
443 the observation of anthranoids *in vivo*. In depth, unlike classical microscopy,  
444 Slmaging allowed us to localize and discriminate VH and related fluorescent  
445 metabolites over time, in living cells. Still, UV-Vis spectrophotometric and  
446 spectrofluorometric analyses were crucial not only to characterize unbiasedly the  
447 fluorescence of compounds in solution, but also to evidence the influence of pH  
448 or complex formation with cations and protein on it. In fact, Slmaging was already  
449 used to study the role of coumarins such as scopoline, fraxin and esculin in the  
450 iron metabolism of *A. thaliana* roots (Robe et al., 2021), but not fraxetin Fra (the  
451 fraxin genuine). Even though Fra is reported as a non-fluorescent coumarin (Tsai  
452 et al., 2018; Lefèvre et al., 2018), our study evidenced that under alkaline or  
453 complexation conditions, its fluorescence is enhanced and modulated depending  
454 on the ligand (Table 1). Surprisingly, the Fra fluorescence spectra recorded by  
455 Slmaging and spectrofluorimetry were significantly different except for Fra-BSA  
456 complex (Table 1, Figure 2F, see Supplemental Figure S3B and SD). In this  
457 context, the overlapping of fluorescence spectra from free and complexed  
458 coumarins is limiting for a clearcut discrimination by Slmaging. In fact, extracting

459 spectra to unmix fluorescence signals was reported (Robe et al., 2021), however  
460 our data indicate a cellular colocalization of molecular species that are therefore  
461 barely distinguishable even with acquisition settings of the fluorescent signal at 9  
462 nm/channel. By contrast, the anthranoids fluorescence spectra are consistent  
463 between SImaging and spectrofluorimetry analyses, allowing good identification  
464 of fluorescent species observed. The fruitful combination of SImaging with the  
465 non-targeted metabolomics was particularly effective in identifying at 5 min and  
466 after 18h, not only key anthranoids metabolites such as madagascine anthrone,  
467 Mad and putative emodin derivatives, but also a battery of Fra methylated,  
468 hydroxylated and glycosylated derivatives. To note, except sideretin, the Fra  
469 methylated and hydroxylated derivatives annotated in our study were not taken  
470 into account in the study of coumarin/iron metabolism in *A. thaliana* (Tsai et al.,  
471 2018; Robe et al., 2021). As coumarin accumulation and trafficking is a complex  
472 and dynamic process, these derivatives also previously reported in *N. tabacum*  
473 (Lefèvre et al., 2018), might be considered for further study in *A. thaliana* as well.  
474 Therefore, non-targeted metabolomics is a clear advantage in elucidating  
475 unraveled metabolic pathways, identifying unintended and scavenged  
476 metabolites prior to targeted metabolomics, being more adapted for systematic  
477 quantitation of known metabolites.

478 For the first time, our study provides an overview of both metabolization  
479 processes and subcellular compartments implied in anthranoids metabolism in  
480 plants, involving at least five cell compartments after VH treatments (primary  
481 vacuole, cytoplasm, ER, Golgi bodies and lipid droplets vesicular bodies). The  
482 cell compartments labelled by anthranoids are consistent with the ER, the cytosol  
483 and the primary vacuole suggested by Han et al. in Rubiaceae (Han et al., 2001),  
484 and the phenotype observed in melanoma cell culture treated with 10  $\mu$ M Emo or  
485 Qui (Verebova et al., 2016). Collocation experiments with plastids marker was  
486 not performed, but in addition to Golgi bodies and lipid droplets, a part of  
487 spherical structures labelled by anthranoids could corresponds to plastids as  
488 reported in *Morinda citrifolia* (Yamamoto et al., 1987). Outstandingly, the acetyl  
489 vismione D (C3-O-geranyl) was assumed to be not fluorescent enough for

490 observation with fluorescence microscopy (Gallé, 2015), here, we have  
491 characterized the fluorescence *in cellula* of VH as well as its degradation  
492 products known as madagascine anthrone and anthraquinone. VH is not only  
493 converted to Mad anthrone and Mad under oxidative conditions such as in  
494 DMSO indeed, but *in vivo* too. Interestingly, the anthrone A20 remains well  
495 detected, whereas in DMSO Mad and bianthrone prevail after 8 h (Gallé, 2015).  
496 After 18 h the amount of VH, Mad and A20 remained insignificantly altered in VH-  
497 treated cells, while the Mad anthrone derivatives A19, A21 were not detected  
498 anymore and Mad abundance considerably decreased in Mad-treated cells after  
499 18 h. Unexpectedly, Mad, which is the less polar molecule ( $R_t = 11.73$  min) was  
500 metabolized into A9 derivative rather than Emo (A8), suggesting that in BY-2  
501 cells other reactions occur with Mad prior to loss of the prenyl moiety. With this  
502 respect, the bright fluorescence in VH-treated cells observed by SImaging at  $\lambda_{405}$   
503 mainly in the cytoplasm (see Supplemental Figure S14C), Golgi bodies (see  
504 Supplemental Figure S15) and the ER (see Supplemental Figure S17)  
505 corresponds to a mixture of anthranol forms of Mad anthrone and VH and/or  
506 complexes, the anthrones being weakly fluorescent (Fujii et al., 1997). It can be  
507 proposed that pH, intracellular  $O_2$ , redox levels or chelation with cations or  
508 proteins may stabilize these forms (Hlasiwetz and Grabowski, 1867; Cameron et  
509 al., 1976; Fujii et al., 1997), detected by SImaging in the different subcellular  
510 compartment. However, we could not discriminate if the fluorescence observed  
511 at  $\lambda_{405}$  in the primary vacuole of VH-treated cells after 18 h corresponds to a non-  
512 annotated metabolite or to VH-LH<sub>2</sub> and/or Mad anthrone neutral forms. Since the  
513 metabolomic analysis evidenced similar anthraquinones between Mad and VH-  
514 treated cells extracts, the spectral fingerprint observed by SImaging at  $\lambda_{488}$   
515 corresponds to Mad and likely the specific Emo A9 and/or A7 derivatives.  
516 Taken together, these results point out that C3-OH substitution of anthranoids is  
517 a key position influencing both the anthranoids fluorescence and metabolization  
518 in BY-2 cells depending on its nature. A free 3-OH allows anthranoids  
519 metabolization into very polar Emo derivatives (A1-A6) as well as hydroxylated,  
520 methylated or glycosylated forms dedicated to a vacuolar storage. In contrast

521 when this position is substituted with a prenyl group as for VH or Mad, the  
522 metabolization is markedly altered producing hydrophobic Emo derivatives (A7  
523 and A9). As we were not able to decipher whether enzymatic or chemical  
524 reactions contributed to putative oxidation and/or isomerization processes, we  
525 can only pinpoint that C3-O-prenylated anthranoids metabolization calls for  
526 targeting to lipid droplets, Golgi bodies and to the ER subcellular location. On a  
527 recurring basis, because VH and Mad anthrone were automatically detected in  
528 VH reference solution, it can be speculated that both chemical isomerization/  
529 tautomerization and VH deacetylation occur *in vivo* too. However, the remarkable  
530 distribution of methylated, hydroxylated, glycosylated and other derivatives in  
531 most treatments is consistent with a well-orchestrated subset of enzymes as it  
532 has been described for Fra or Emo (Gill, 2001; Tsai et al., 2018). To clarify these  
533 aspects, in the future it would be interesting to purify fluorescent labelled  
534 organellar fractions and analyze the transcriptome and proteome. From a general  
535 point of view, the total contents of metabolites detected in Emo and Qui-treated  
536 cells were doubled after 18 h, halved for Mad- or VH-treated cells and remains  
537 constant in Fra-treated cells (Figure 6D). Although, related metabolites seem to  
538 be accumulated over time in Emo, Qui and Fra-treated cells, the abundance of  
539 references was 26, 3.5 and 16 times lower after 18 h, confirming their  
540 metabolization/storage. In contrast, the Mad and VH abundance in treated cells  
541 changed weakly, supporting the fact that both VH and Mad are transformed *in*  
542 *vivo* into non-annotated metabolites and metabolization rate of prenylated  
543 anthranoids in BY-2 cells is limited.

544 Interestingly, our data unambiguously evidenced that tobacco BY-2 cells are  
545 competent to take up and metabolize anthranoids, not produced by *N. tabacum*  
546 plants. Due to its low cost, low autofluorescence and heterogeneous metabolism,  
547 the BY-2 cell model is of particular interest and could undoubtedly serve to study  
548 metabolism and localization of other molecules of interest in living organisms. As  
549 long as anthranoids and other naturally occurring fluorescent compounds are  
550 valuable, it would be interesting to extend this study to investigate unknown  
551 aspects of the biosynthesis pathways and the influence of biotic and abiotic

552 factors on the metabolism of anthranoids and other fluorescent compounds.  
553 From another point of view, the developed approach offers interesting  
554 perspectives in the medical field, as VH and similar compounds have been  
555 described for their antimalarial properties (François et al., 1999; Mazimba et al.,  
556 2013; Gallé, 2015), but the biological targets as well as mechanisms of action  
557 remain unknown. Last, it would be interesting to reproduce experiments in red  
558 blood cells infected by *P. falciparum* treated with VH and analogs, therefore  
559 opening an avenue to fluorescence localization/structure/activity relationships  
560 studies. To be deciphered, the complexity of metabolic pathways requires more  
561 than ever multifactorial analyses of living organisms, this SImaging approach  
562 coupled with non-targeted metabolomics allows efficient characterization of  
563 subcellular location and bioconversion of fluorescent metabolites in living plant  
564 cells.

565

## 566 **METHODS**

### 567 **Chemicals**

568 Fraxetin (7,8-dihydroxy-6-methoxy-coumarin), quinizarin (1,4-dihydroxy-  
569 anthraquinone), emodin (1,3,8-trihydroxy-6-methyl-9,10-anthracenedione),  
570 lapachol (2-hydroxy-3-(3-methyl-2-butenyl)-1,4-naphthoquinone) were purchased  
571 from Sigma-Aldrich. Vismione H and madagascine were obtained from PGE2  
572 fraction of *Psorospermum glaberimum* as previously described (Gallé, 2015).  
573 Other chemicals were from usual commercial sources with the highest purity  
574 available.

575

### 576 **Spectrofluorimetric analyses**

577 First, the  $pK_a$  values of the selected compounds were measured in EtOH/water  
578 (see supplemental Table S1). Then, Different solutions of the pure compounds at  
579 0.01 mg/ml were prepared from stock solutions in EtOH at 1 mg/mL and then  
580 diluted either in EtOH/H<sub>2</sub>O 1:1 v/v, 0.1 M NaCl adjusted with HCl 10<sup>-2</sup> M (pH 2),  
581 Na<sub>2</sub>B<sub>4</sub>O<sub>7</sub> 0.01 M or NH<sub>4</sub>HCO<sub>3</sub> (pH 10), NaOH 10<sup>-2</sup> M (pH 12) or in EtOAc. The  
582 absorbance spectra of (de)protonated species in solution were measured from

583 260 – 800 nm using a Cary 5000 UV-Vis.-NIR spectrophotometer (Agilent, Santa  
584 Clara USA) prior to any fluorescence analysis. Fluorescence spectra of solutions  
585 diluted 10-fold were recorded with 3.5 mL Suprasil<sup>®</sup> quartz optical cells of 10 mm  
586 pathlength using a LS-50B spectrofluorimeter monitored with UVWinlab 5.1  
587 software (Perkin Elmer, Waltham USA). For each compound, fluorescence  
588 emission spectrum was recorded by exciting close or at the maximum absorption  
589 wavelength, and instrumental parameters were adjusted to a scanning speed of  
590 400 nm/min and excitation/emission bandwidths adjusted between 4.5 and 15  
591 nm depending on the conditions. The fluorescence spectra of each compound  
592 were established by successive determination of the excitation ( $\lambda_{Ex}$ ) and  
593 emission ( $\lambda_{Em}$ ) maxima. A FluoroMax-4 spectrofluorimeter (HORIBA, Kyoto  
594 Japan) was then used to accurately determine the quantum yields of anthranoids  
595 at 0.001 mg/ml with one exception (0.0015 mg/mL for emodin) in solutions at pH  
596 2 and at pH 10 only for VH and Fra. The quantum yields of the fluorescent  
597 species ( $\Phi_F$ ) were calculated by using the equation below with either rhodamine  
598 6G (R6G) or cresyl violet references.

$$\Phi_F = \Phi_R \frac{\int I_F A_R n_F^2}{\int I_R A_S n_R^2}$$

599  $\Phi_R$  corresponds to the quantum yield of reference. The indices F and R denote  
600 sample and reference, respectively. The integrals over I represent areas of the  
601 corrected emission spectra, A is the optical density at the excitation wavelength  
602 and  $n_R$  and  $n_S$  correspond to the refractive index of the reference and the sample  
603 solutions, respectively.

604

### 605 **Ca<sup>2+</sup> and Mg<sup>2+</sup> chelating assay**

606 Fresh stock solution of VH (2.6 mM) in EtOH was further diluted 100-fold in  
607 EtOH/H<sub>2</sub>O 1:1 v/v containing 0.1 M NaCl. UV-Vis spectrophotometric titrations of  
608 the solutions were then carried out by adding increasing amounts of CaCl<sub>2</sub> or  
609 MgCl<sub>2</sub> and monitored using a Cary 5000 UV-Vis-NIR (Agilent, Santa Clara USA).  
610 0.1 M CaCl<sub>2</sub> or MgCl<sub>2</sub> (25  $\mu$ L) prepared in water were successively added to 2  
611 mL of the ligand solution (VH: 26  $\mu$ M). The Ca<sup>2+</sup> and Mg<sup>2+</sup> chelating properties of



612 VH were also investigated by fluorescence emission, adding 0.1 M  $\text{CaCl}_2$  (150  
613 and 300  $\mu\text{L}$ ) or 0.1 M  $\text{MgCl}_2$  solutions to a 2.6  $\mu\text{M}$  VH solution. The quantum  
614 yields of the  $\text{Ca}^{2+}$  and  $\text{Mg}^{2+}$  chelates with VH were measured as described in the  
615 *spectrofluorimetric analysis* section.

616

### 617 **Plant material and treatment**

618 The *Nicotiana tabacum* cv. Bright Yellow 2 (tobacco BY-2) cell suspension was  
619 made available by Toshiyuki Nagata (Tokyo University, Japan) and cultivated at  
620 26 °C, on a rotary shaker set at 140 rpm in the dark, in modified Murashige and  
621 Skoog (MS) medium as reported (Hemmerlin and Bach, 2000). For treatments,  
622 7-days old cells were diluted five-fold into fresh MS medium and distributed (3  
623 mL) in 6-well culture plates (Sarstedt, Nümbrecht Germany) containing 25 or 50  
624  $\mu\text{M}$  of phenolic compounds. Slmaging acquisitions were carried out either after 5  
625 min incubation or after 18 h.

626

### 627 **Spectral imaging (Slmaging) microscopy**

628 Treated cells or pure compounds at 1 mM in the solutions at pH 2, pH 10 and pH  
629 12 were observed using a LSM780 confocal laser microscope (Carl Zeiss, Jena  
630 Germany) equipped with an inverted Zeiss AxioObserver Z1, a Plan-Apochromat  
631 20x/0.8 M27 objective, a numerical zoom adjusted to 2.8 with a laser strength of  
632 5 %. Images and emission spectra were acquired using the excitation  
633 wavelengths at 405 ( $\lambda_{405}$ ) and 488 nm ( $\lambda_{488}$ ) with the emission light collected into  
634 multiple channels incremented by 9 nm from 415 to 664 nm and 498 to 664 nm,  
635 respectively. The lambda view images correspond to superimposed fluorescence  
636 recorded in each channel according to natural light spectrum. The spectral  
637 analysis was done after the extraction of emission spectra from images by  
638 manual component extraction of 1  $\mu\text{m}$  circles in different cell compartment  
639 labelled by a fluorescence. Images were exported from Zen v2 software (Zeiss,  
640 Jena Germany) and assembled in figure using ImageJ v1.53d.

641

### 642 **Spectral data analysis**

643 The dataset consisted of 10 spectra/cell collected from five cells in three  
644 independent biological replicates for each treatment, at 25 and 50  $\mu\text{M}$ , after 5 min  
645 and 18 h. Intensities per channels of each spectrum were averaged per cell and  
646 normalized to 1 before statistical analysis with R software V4.0.0 (GNU GPLv2, R  
647 Core Team) and RStudio V 1.2.5001 (AGPLv3, RStudio) using the ChemoSpec  
648 package V5.2.12. A distant matrix was established for each dataset applying the  
649 Pearson's correlation coefficient, and a robust principal component analysis  
650 (PCA) was performed. The same procedure was used with solutions of pure  
651 compounds to analyze 10 spectra/acquisition in triplicate.

652

### 653 **Non-targeted metabolomic analysis**

654 Freeze-dried BY-2 cells (25 mg) treated for 15 min or 18 h with 50  $\mu\text{M}$  of each  
655 compound were extracted in MeOH (3x300  $\mu\text{L}$ ), sonicated during 20 min at 80  
656 kHz (Fisherbrand™ S-series), then the total extract was filtered prior to analysis.  
657 Standard solution at 0.002 mg/mL in EtOH and MeOH extracts from three  
658 independent biological replicates were analyzed by non-targeted metabolomics  
659 approach performed on the UltiMate 3000 UHPLC system (Thermo) coupled to  
660 the ImpactII (Bruker) high resolution Quadrupole Time-of-Flight (QTOF) as  
661 previously described (Villette et al., 2018). Samples were kept at 4°C, 3  $\mu\text{L}$  were  
662 injected with a washing step after sample injection with a wash solution  
663 ( $\text{H}_2\text{O}/\text{MeOH}$ , 90/10, v/v, 150  $\mu\text{L}$ ). The spectrometer was equipped with an  
664 electrospray ionization (ESI) source and operated in positive ion mode on a mass  
665 range from 20 to 1000 Da with a spectra rate of 2Hz in AutoMS/MS  
666 fragmentation mode. The end plate offset was set at 500 V, capillary voltage at  
667 2500 V, nebulizer at 2 Bar, dry gas at 8  $\text{L}\cdot\text{min}^{-1}$  and dry temperature at 200°C.  
668 The transfer time was set at 20-70 $\mu\text{s}$  and MS/MS collision energy at 80-120%  
669 with a timing of 50-50% for both parameters. The MS/MS cycle time was set to 3  
670 seconds, absolute threshold to 816 cts and active exclusion was used with an  
671 exclusion threshold at 3 spectra, release after 1 min and precursor ion was  
672 reconsidered if the ratio current intensity/previous intensity was higher than 5.  
673 Raw data were processed in MetaboScape 4.0 software (Bruker): molecular

674 features were considered and grouped into buckets containing one or several  
675 adducts and isotopes from the detected ions with their retention time and MS/MS  
676 information when available. The parameters used for bucketing are a minimum  
677 intensity threshold of 1000, a minimum peak length of 3 spectra, a signal-to-noise  
678 ratio (S/N) of 3 and a correlation coefficient threshold set at 0.8. The  $[M+H]^+$ ,  
679  $[M+Na]^+$ ,  $[M+K]^+$  and  $[M+NH_4]^+$  ions were authorized as possible primary ions.  
680 The obtained list of buckets was annotated using a custom analyte list derived  
681 from *in silico* predicted metabolites (catabolites and conjugates) of the  
682 compounds of interest. The *in silico* prediction was performed using  
683 MetabolitePredict 2.0 (Bruker) as previously described (Villette et al., 2019).  
684 Briefly, 79 biotransformation rules were used to predict metabolites over 2  
685 generations. The maximum allowed variation on the mass ( $m/z$ ) was set to 3  
686 ppm, and the maximum mSigma value (assessing the good fitting of isotopic  
687 patterns) was set to 30. The changes in abundance of each metabolites  
688 annotated were appreciated using a statistical analysis by comparing the area  
689 obtained under the chromatogram curve of the different metabolites analyzed in  
690 triplicates. The homogeneity of the variance was checked with a Levene prior to  
691 a Kruskal-Wallis test, followed by multi comparison procedure using post-hoc  
692 Dunnett's test.

693

## 694 **SUPPLEMENTAL DATA**

695 **Supplemental Figure S1.** Influence of pH on absorption properties of studied  
696 phenolic compounds

697 **Supplemental Figure S2.** Fluorescence emission/excitation spectra of studied  
698 compounds in solution at different pH

699 **Supplemental Figure S3.** Normalized fluorescence excitation/emission and  
700 absorption spectra of  $LNH_4^+$  and LBSA complexes

701 **Supplemental Figure S4.** UV-Vis. absorption titration of vismione H by Ca(II)

702 **Supplemental Figure S5.** UV-Vis. absorption titration of vismione H by Mg(II).

703 **Supplemental Figure S6.** Absorption and fluorescence emission spectra of  
704 anthranoids and fraxetin LBSA complexes

- 705 **Supplemental Figure S7.** Corrected Absorption and fluorescence properties of  
706 fraxetin and vismione LBSA complexes.
- 707 **Supplemental Figure S8.** Images of fluorescent species from studied phenolic  
708 compounds in solution observed by SImaging.
- 709 **Supplemental Figure S9.** Normalized average spectra and images from  
710 SImaging analysis of lapachol treated cells.
- 711 **Supplemental Figure S10.** Fluorescence spectra and images of BY-2 cells  
712 treated by 50 $\mu$ M of phenolic compounds prior to observation using SImaging
- 713 **Supplemental Figure S11.** Distant matrix of normalized average spectra  
714 obtained by SImaging analysis of By-2 cells were treated or not with 25  $\mu$ M of  
715 phenolic compounds.
- 716 **Supplemental Figure S12.** PCA of normalized average spectra obtained by  
717 SImaging analysis of cells treated or not with 50  $\mu$ M of phenolic compounds
- 718 **Supplemental Figure S13.** Distant matrix of normalized average spectra  
719 obtained by SImaging analysis of cells treated or not with 50  $\mu$ M of phenolic  
720 compounds
- 721 **Supplemental Figure S14.** Anthranoids fluorescence locates in the cytoplasm of  
722 living BY-2 cells labeled with fluorescein diacetate viability marker after 18 h of  
723 treatment.
- 724 **Supplemental Figure S15.** Vismione H and related anthraquinones  
725 fluorescence locate in the Golgi body of BY-2 cells.
- 726 **Supplemental Figure S16.** Vismione H related anthraquinones fluorescence  
727 locate in lipid droplets of living BY-2 cells
- 728 **Supplemental Figure S17.** Anthranoids fluorescence locate in the endoplasmic  
729 reticulum of BY-2 cells.
- 730 **Supplemental Figure S18.** Non-targeted metabolomics of BY-2 cells treated by  
731 studied phenolic compounds
- 732 **Supplemental Table S1.** pKa values of pure compounds measured in solution.

733 **Supplemental Table S2.** Metabolites identified in non-targeted metabolomic  
734 analysis of MeOH extracts from BY-2 cells treated with 50  $\mu$ M Lap

735 **Supplemental Table S3.** Metabolites identified in non-targeted metabolomic  
736 analysis of MeOH extracts from BY-2 cells treated with 50  $\mu$ M Fra

737 **Supplemental Table S4.** Metabolites identified in non-targeted metabolomic  
738 analysis of MeOH extracts from BY-2 cells treated with 50  $\mu$ M Qui.

739 **Supplemental Table S5.** Metabolites and fragments identified in non-targeted  
740 metabolomic analysis of MeOH extracts from BY-2 cells treated with 50  $\mu$ M Emo,  
741 Mad and VH.

742

### 743 **ACKNOWLEDGMENTS**

744 This work was supported by the French National Centre for Scientific Research  
745 and the University of Strasbourg. We thank Dr. Gilles Ulrich (Institut de Chimie  
746 des Procédés pour l'Énergie, l'Environnement et la Santé, Strasbourg) for access  
747 to the spectrofluorometer to establish reference spectra and quantum yields. We  
748 thank to Pr. Thomas J. Bach (Institut de Biologie Moléculaire des Plantes,  
749 Strasbourg) for sharing collection of phenolic compounds and to Dr. Dimitri  
750 Heintz for access to mass spectrometry equipments (metabolomics facility,  
751 IBMP). We are also grateful to Stephanie Riché and Dr. Sridevi Ramanoudjame  
752 (Laboratoire d'Innovation Thérapeutique, Strasbourg) for excellent technical  
753 assistance to purify vismione H. We acknowledge helpful criticism and discussion  
754 with Dr. Romain Duval and Dr. Elisabeth Davioud-Charvet.

755

### 756 **AUTHOR CONTRIBUTIONS**

757 Q.C., C.V.-S., A.H., M.E., J.M., N.G., designed the research; Q.C., V.M., M.E.,  
758 performed research; Q.C., J.-B.G., N.W., M.E., V.M., C.V., J.M., contributed new  
759 reagents/analytic tools; Q.C., V.M., C.V., M.M.E., analyzed data; and Q.C., J.-  
760 B.G., V.M., C.V., M.M.E., M.E., H.S., A.H., C.V.-S., wrote the article.

761

### 762 **REFERENCES**

763 **Batchelor-McAuley, C., Dimov, I.B., Aldous, L., and Compton, R.G.** (2011).

- 764 The electrochemistry of quinizarin revealed through its mediated reduction of  
765 oxygen. *Proc. Natl. Acad. Sci.* **108**: 19891–19895.
- 766 **Binzel, M.L., Hess, F.D., Bressan, R.A., and Hasegawa, P.M.** (1988).  
767 Intracellular Compartmentation of Ions in Salt Adapted Tobacco Cells. *Plant*  
768 *Physiol.* **86**: 607–614.
- 769 **Cameron, D., Edmonds, J., and Raverty, W.** (1976). Oxidation of emodin  
770 anthrone and stereochemistry of emodin bianthrone. *Aust. J. Chem.* **29**: 1535.
- 771 **Carden, D.E., Walker, D.J., Flowers, T.J., and Miller, A.J.** (2003). Single-Cell  
772 Measurements of the Contributions of Cytosolic Na<sup>+</sup> and K<sup>+</sup> to Salt Tolerance.  
773 *Plant Physiol.* **131**: 676–683.
- 774 **Chiang, Y.-M., Szewczyk, E., Davidson, A.D., Entwistle, R., Keller, N.P.,**  
775 **Wang, C.C.C., and Oakley, B.R.** (2010). Characterization of the *Aspergillus*  
776 *nidulans* Monodictyphenone Gene Cluster. *Appl. Environ. Microbiol.* **76**: 2067–  
777 2074.
- 778 **Conéjéro, G., Noirot, M., Talamond, P., and Verdeil, J.-L.** (2014). Spectral  
779 analysis combined with advanced linear unmixing allows for histolocalization of  
780 phenolics in leaves of coffee trees. *Front. Plant Sci.* **5**.
- 781 **Dong, X., Fu, J., Yin, X., Cao, S., Li, X., Lin, L., Huyiligeqi, and Ni, J.** (2016).  
782 Emodin: A Review of its Pharmacology, Toxicity and Pharmacokinetics: Emodin:  
783 Pharmacology, Toxicity and Pharmacokinetics. *Phytother. Res.* **30**: 1207–1218.
- 784 **Dudev, T. and Lim, C.** (2004). Monodentate versus Bidentate Carboxylate  
785 Binding in Magnesium and Calcium Proteins: What Are the Basic Principles? *J.*  
786 *Phys. Chem. B* **108**: 4546–4557.
- 787 **Duval, R., Cottet, K., Blaud, M., Merckx, A., Houzé, S., Grellier, P.,**  
788 **Lallemand, M.-C., and Michel, S.** (2020). A Photoalkylative Fluorogenic Probe  
789 of Guttiferone A for Live Cell Imaging and Proteome Labeling in *Plasmodium*  
790 *falciparum*. *Molecules* **25**: 5139.
- 791 **Duval, R. and Duplais, C.** (2017). Fluorescent natural products as probes and  
792 tracers in biology. *Nat. Prod. Rep.* **34**: 161–193.
- 793 **Elkazaz, S. and Jones, P.B.** (2010). Photochemical Hydroxylation of 1-Methyl-  
794 9,10-anthraquinones: Synthesis of 9'-Hydroxyaloesaponarin II. *J. Org. Chem.* **75**:  
795 412–416.
- 796 **Fain, V.Ya., Zaitsev, B.E., and Ryabov, M.A.** (2006). Tautomerism of  
797 anthraquinones: V. 1,5-Dihydroxy-9,10-anthraquinone and its substituted  
798 derivatives. *Russ. J. Org. Chem.* **42**: 1662–1667.
- 799 **François, G., Steenackers, T., Assi, L.A., Steglich, W., Lamottke, K., Holenz,**  
800 **J., and Bringmann, G.** (1999). Vismione H and structurally related anthranoid  
801 compounds of natural and synthetic origin as promising drugs against the human  
802 malaria parasite *Plasmodium falciparum* : structure-activity relationships.  
803 *Parasitol. Res.* **85**: 582–588.
- 804 **Friedman, M. and Jürgens, H.S.** (2000). Effect of pH on the Stability of Plant  
805 Phenolic Compounds. *J. Agric. Food Chem.* **48**: 2101–2110.
- 806 **Fujii, T., Mishima, S., Tanaka, N., Kawauchi, O., Kodaira, K., Nishikiori, H.,**  
807 **and Kawai, Y.** (1997). Absorption and fluorescence spectra of 9-anthrol and its  
808 chemical species in solution. *Res. Chem. Intermed.* **23**: 829–839.
- 809 **Furumoto, T. and Jindai, A.** (2008). Isolation and Photoisomerization of a New



- 810 Anthraquinone from Hairy Root Cultures of *Sesamum indicum*. *Biosci.*  
811 *Biotechnol. Biochem.* **72**: 2788–2790.
- 812 **Gallé, J.-B.** (2015). Pharmacochimie d’anthranoïdes issus du genre  
813 *Psorospermum* (Hypericaceae): isolement, activités antiparasitaires et synthèse  
814 d’analogues structuraux Jean-Baptiste Galle.
- 815 **Gill, M.** (2001). The Biosynthesis of Pigments in Basidiomycetes. *Aust. J. Chem.*  
816 **54**: 721.
- 817 **Giusti, M.M. and Wrolstad, R.E.** (2001). Characterization and Measurement of  
818 Anthocyanins by UV-Visible Spectroscopy. *Curr. Protoc. Food Anal. Chem.* **00**:  
819 F1.2.1-F1.2.13.
- 820 **Guo, W., Chen, S., Hussain, N., Cong, Y., Liang, Z., and Chen, K.** (2015).  
821 Magnesium stress signaling in plant: Just a beginning. *Plant Signal. Behav.* **10**:  
822 e992287.
- 823 **Han, Y.-S., Van der Heijden, R., and Verpoorte, R.** (2001). Biosynthesis of  
824 anthraquinones in cell cultures of the Rubiaceae. *Plant Cell Tissue Organ Cult.*  
825 **67**: 201–220.
- 826 **Hemmerlin, A. and Bach, T.J.** (2000). Farnesol-induced cell death and  
827 stimulation of 3-hydroxy-3-methylglutaryl-coenzyme A reductase activity in  
828 tobacco cv bright yellow-2 cells. *Plant Physiol.* **123**: 1257–1268.
- 829 **Hepler, P.K.** (2005). Calcium: A Central Regulator of Plant Growth and  
830 Development. *Plant Cell* **17**: 2142–2155.
- 831 **Hlasiwetz, H. and Grabowski, A.** (1867). Mittheilungen aus dem chemischen  
832 Laboratorium in Innsbruck. I. Ueber die Carminsäure; *Ann. Chem. Pharm.* **141**:  
833 329–345.
- 834 **Kang, S.-H. et al.** (2020). Genome-enabled discovery of anthraquinone  
835 biosynthesis in *Senna tora*. *Nat. Commun.* **11**: 5875.
- 836 **Lefèvre, F., Fourmeau, J., Pottier, M., Bajiot, A., Cornet, T., Abadía, J.,**  
837 **Álvarez-Fernández, A., and Boutry, M.** (2018). The *Nicotiana tabacum* ABC  
838 transporter NtPDR3 secretes O-methylated coumarins in response to iron  
839 deficiency. *J. Exp. Bot.* **69**: 4419–4431.
- 840 **Martinière, A., Bassil, E., Jublanc, E., Alcon, C., Reguera, M., Sentenac, H.,**  
841 **Blumwald, E., and Paris, N.** (2013). In Vivo Intracellular pH Measurements in  
842 Tobacco and *Arabidopsis* Reveal an Unexpected pH Gradient in the  
843 Endomembrane System. *Plant Cell* **25**: 4028–4043.
- 844 **Mazimba, O., Nana, F., and Singh, G.S.** (2013). Xanthonés and Anthranoids  
845 from the Medicinal Plants of Africa. In *Medicinal Plant Research in Africa*, V.  
846 Kuete, ed (Elsevier), pp. 393–434.
- 847 **Nagata, T., Nemoto, Y., and Hasezawa, S.** (1992). Tobacco BY-2 Cell Line as  
848 the “HeLa” Cell in the Cell Biology of Higher Plants. In *International Review of*  
849 *Cytology* (Elsevier), pp. 1–30.
- 850 **Osoba, O.A. and Roberts, M.F.** (1994). Methyltransferase activity in *Ailanthus*  
851 *altissima* cell suspension cultures. *Plant Cell Rep.* **13**: 277–281.
- 852 **Robe, K. et al.** (2021). Coumarin accumulation and trafficking in *Arabidopsis*  
853 *thaliana*: a complex and dynamic process. *New Phytol.* **229**: 2062–2079.
- 854 **Rossi, S., Tabolacci, C., Lentini, A., Provenzano, B., Carlomosti, F.,**  
855 **Frezzotti, S., and Beninati, S.** (2010). Anthraquinones danthron and quinizarin

- 856 exert antiproliferative and antimetastatic activity on murine B16-F10 melanoma  
857 cells. *Anticancer Res.* **30**: 445–449.
- 858 **Sedaira, H., Idriss, K.A., Seleim, M.M., and Abdel-Aziz, M.S.** (1998). Use of  
859 Quinizarin as a Spectrophotometric Reagent for MgO Content Analysis of  
860 Portland Cement and Cement Clinker. *Monatshefte Für Chem. Chem. Mon.* **129**:  
861 49–58.
- 862 **Shen, J., Zeng, Y., Zhuang, X., Sun, L., Yao, X., Pimpl, P., and Jiang, L.**  
863 (2013). Organelle pH in the Arabidopsis Endomembrane System. *Mol. Plant* **6**:  
864 1419–1437.
- 865 **Srinivas, G., Babykutty, S., Sathiadevan, P.P., and Srinivas, P.** (2007).  
866 Molecular mechanism of emodin action: Transition from laxative ingredient to an  
867 antitumor agent. *Med. Res. Rev.* **27**: 591–608.
- 868 **Stringlis, I.A., de Jonge, R., and Pieterse, C.M.J.** (2019). The Age of  
869 Coumarins in Plant–Microbe Interactions. *Plant Cell Physiol.* **60**: 1405–1419.
- 870 **Talamond, P., Verdeil, J.-L., and Conéjéro, G.** (2015). Secondary Metabolite  
871 Localization by Autofluorescence in Living Plant Cells. *Molecules* **20**: 5024–5037.
- 872 **Tissier, A., Ziegler, J., and Vogt, T.** (2014). Specialized Plant Metabolites:  
873 Diversity and Biosynthesis. In *Ecological Biochemistry*, G.-J. Krauss and D.H.  
874 Nies, eds (Wiley-VCH Verlag GmbH & Co. KGaA: Weinheim, Germany), pp. 14–  
875 37.
- 876 **Tsai, H.-H., Rodríguez-Celma, J., Lan, P., Wu, Y.-C., Vélez-Bermúdez, I.C.,**  
877 **and Schmidt, W.** (2018). Scopoletin 8-Hydroxylase-Mediated Fraxetin  
878 Production Is Crucial for Iron Mobilization. *Plant Physiol.* **177**: 194–207.
- 879 **Verebova, V., Belej, D., Joniova, J., Jurasekova, Z., Miskovsky, P., Kozar, T.,**  
880 **Horvath, D., Stanicova, J., and Huntosova, V.** (2016). Deeper insights into the  
881 drug defense of glioma cells against hydrophobic molecules. *Int. J. Pharm.* **503**:  
882 56–67.
- 883 **Villette, C., Maurer, L., Wanko, A., and Heintz, D.** (2019). Xenobiotics  
884 metabolism in *Salix alba* leaves uncovered by mass spectrometry imaging.  
885 *Metabolomics* **15**: 122.
- 886 **Villette, C., Zumsteg, J., Schaller, H., and Heintz, D.** (2018). Non-targeted  
887 metabolic profiling of BW312 *Hordeum vulgare* semi dwarf mutant using UHPLC  
888 coupled to QTOF high resolution mass spectrometry. *Sci. Rep.* **8**.
- 889 **Waters, B.M.** (2011). Moving magnesium in plant cells: Commentary. *New*  
890 *Phytol.* **190**: 510–513.
- 891 **Yamamoto, H., Tabata, M., and Leistner, E.** (1987). Cytological changes  
892 associated with induction of anthraquinone synthesis in photoautotrophic cell  
893 suspension cultures of *Morinda lucida*. *Plant Cell Rep.* **6**: 187–190.
- 894

1 **FIGURES AND TABLES**  
 2

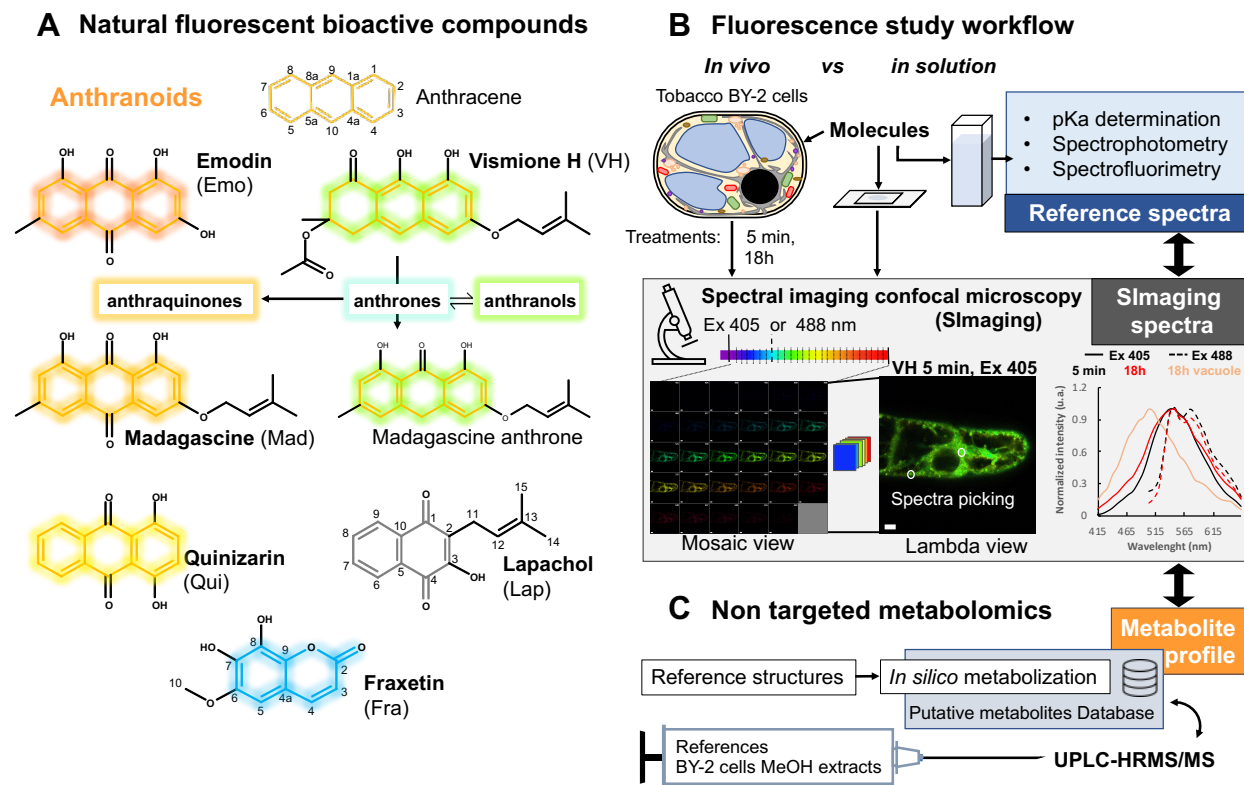

3  
 4  
 5 **Figure 1.** Overview of natural fluorescent bioactive anthranoids and the original  
 6 approach used to study their localization and biotransformation in living cells.  
 7 **(A)** Chemical structures of anthranoids characterized by the anthracene skeleton  
 8 (orange skeleton) as compared to other phenolic compounds such as the  
 9 naphthoquinone lapachol (Lap, black skeleton) and the coumarin fraxetin (Fra, blue  
 10 skeleton). In dimethylsulfoxide (DMSO), vismione H (VH) degrades quickly into  
 11 anthrones (weak turquoise fluorescence) being in equilibrium with anthranol  
 12 tautomers (strong green yellowish) and oxidized into anthraquinones such as  
 13 emodin (Emo), madagascine (Mad) or quinizarin (Qui) (yellow to red fluorescence).  
 14 **(B-C)** Spectral imaging and non-targeted metabolomic workflow to characterize  
 15 biotransformation of fluorescent anthranoids in tobacco BY-2 cells. **(B)**  
 16 Fluorescence of selected anthranoids is evaluated in solution, then these  
 17 anthranoids (25 or 50  $\mu$ M) are used to feed cells for confocal spectral imaging  
 18 microscopy at 5 min and 18 h after feeding. **(C)** Non-targeted metabolomics  
 19 workflow implementing high-resolution mass spectrometry analysis of methanolic  
 20 extracts from cells characterized in **(B)**.

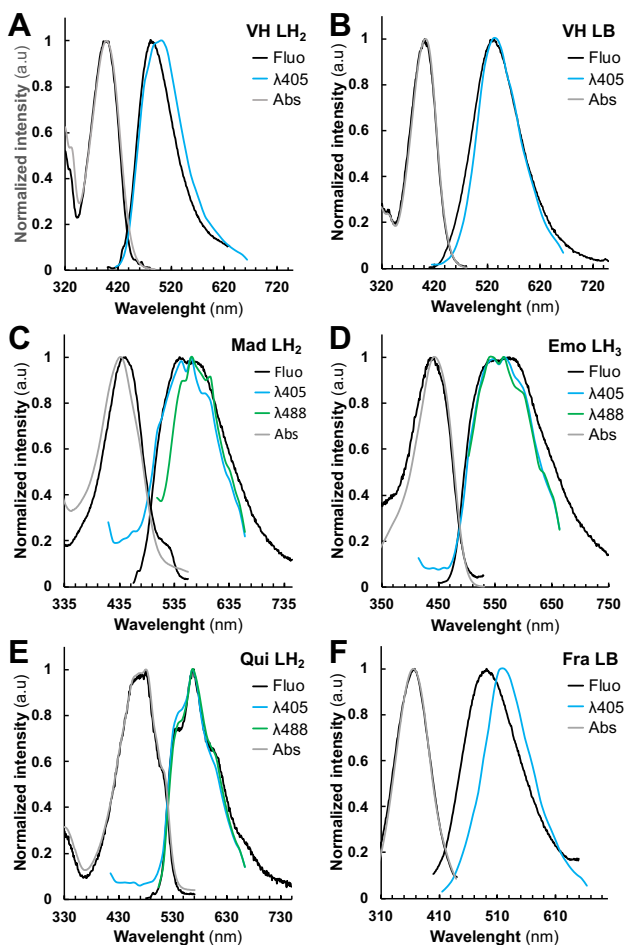

21  
22  
23  
24  
25  
26  
27  
28  
29  
30  
31  
32

**Figure 2.** Normalized fluorescence excitation/emission and absorption spectra of studied compounds.

(A) vismione H VH (neutral LH<sub>2</sub> species) and (B) (boron complex LB species), (C) quinizarin Qui (neutral LH<sub>2</sub> species), (D) emodin Emo (neutral LH<sub>3</sub> species), (E) madagascine Mad (neutral LH<sub>2</sub> species), (F) fraxetin Fra (boron complex LB species) in saline ethanolic solutions. Excitation and emission spectra obtained from the spectrofluorimetric analysis (black), absorption spectra obtained from the UV-Vis. analysis (grey) and SImaging at  $\lambda_{405}$  (blue) and/or  $\lambda_{488}$  (green) settings.

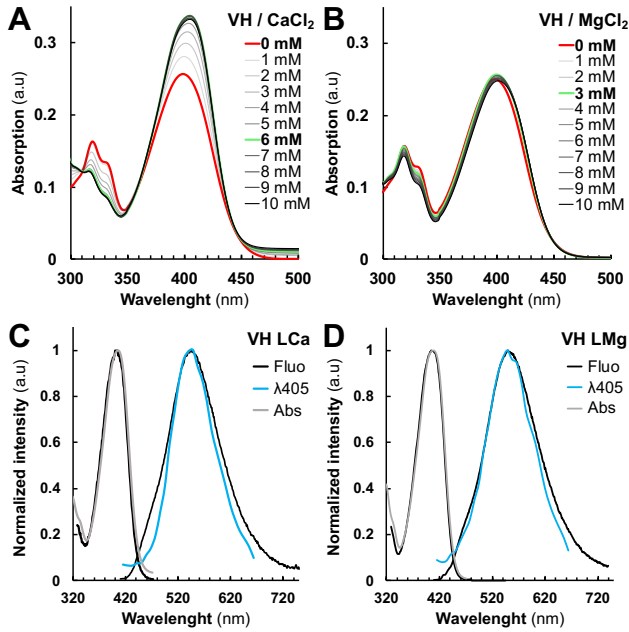

33  
 34  
 35  
 36  
 37  
 38  
 39  
 40  
 41  
 42  
 43

**Figure 3.** Vismione H VH photophysical properties are influenced by metal cations complexation.  
**(A-B)** Absorption spectra of metal complexes formed by VH with different amount of **(A)** Ca(II) and **(B)** Mg(II) spectra with no complex formed (bold red) and with the highest changes in the absorption spectrum (bold green). Normalized fluorescence (black), absorption (grey) and SImaging spectra of **(C)** VH-Ca and **(D)** VH-Mg complexes at  $\lambda_{405}$  settings.



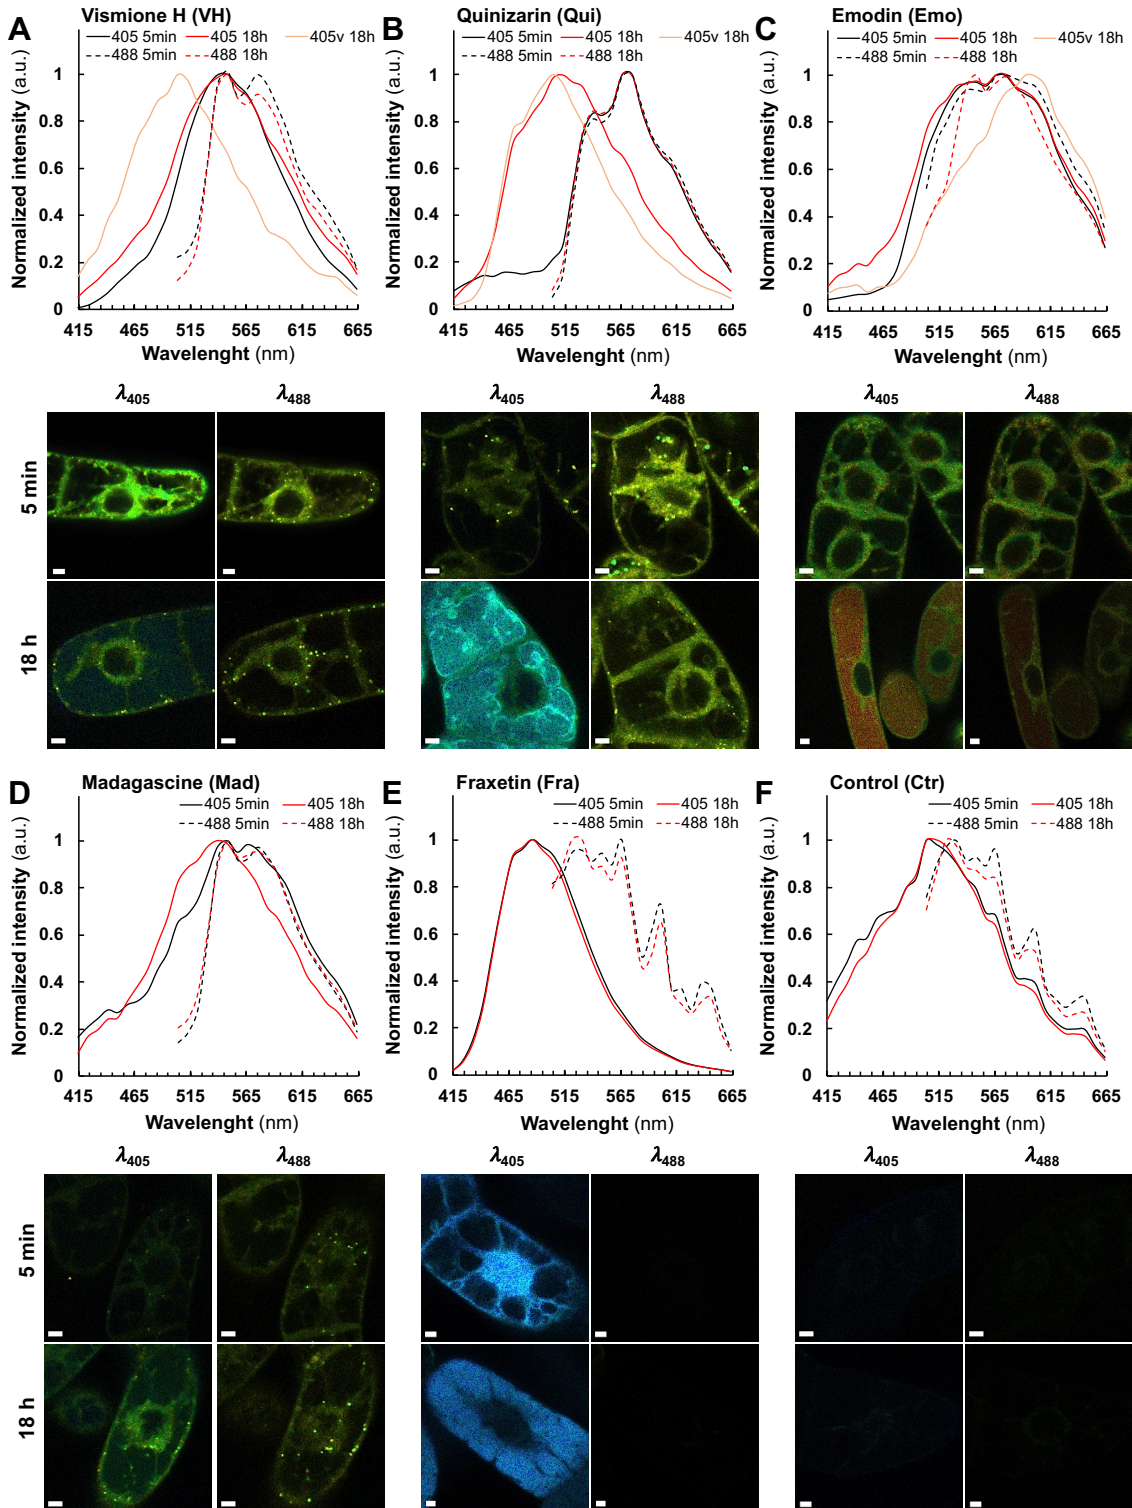

44  
 45  
 46



47 **Figure 4.** Fluorescence spectra and images of BY-2 cells treated by 25  $\mu$ M of  
48 phenolic compounds prior to observation using SImaging.  
49 Normalized fluorescence average spectra and lambda view images from SImaging  
50 analysis at  $\lambda_{405}$  (solid line) and  $\lambda_{488}$  (dashed line) of BY-2 cells treated for 5 min and  
51 18 h with 25  $\mu$ M of **(A)** vismione H, **(B)** quinizarin, **(C)** emodin, **(D)** madagascine,  
52 **(E)** fraxetin and **(F)** the negative control without treatment. Spectra observed after  
53 5 min (black), after 18 h (red) and in the vacuole after 18 h (red light). Spectra  
54 observed in the primary vacuole at  $\lambda_{405}$  after 18 h are specified with a “v” after the  
55 labels if another fluorescence was observed in the cytoplasm. Bars = 20  $\mu$ m.

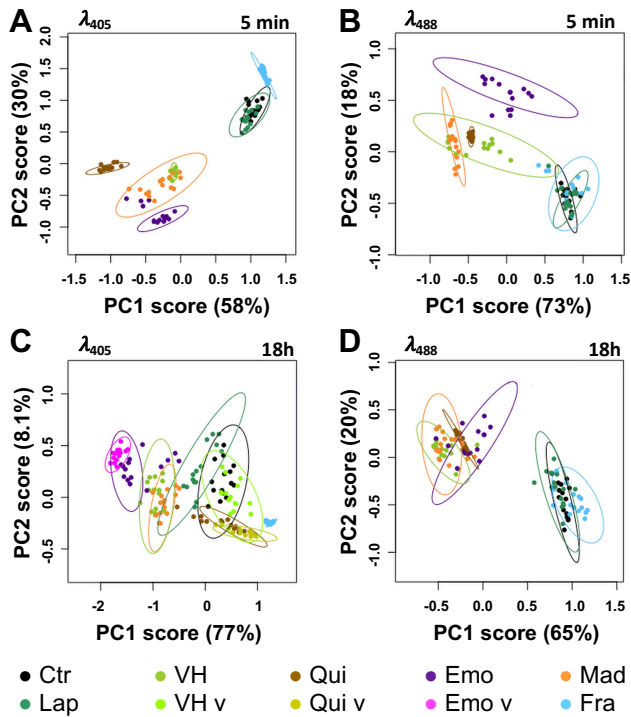

56

57 **Figure 5.** PCA of normalized average spectra obtained by Slmaging analysis of  
 58 BY-2 cells treated or not (Ctr) with 25  $\mu\text{M}$  of phenolic compounds.

59 **(A, B)** Differences observed after 5 min treatments and **(C, D)** 18 h with vismione  
 60 H VH, madagascine Mad, emodin Emo, quinizarin Qui, fraxetin Fra and lapachol  
 61 Lap. Spectra observed at  $\lambda_{405}$  **(A, C)** and  $\lambda_{488}$  **(B, D)** in control and treated cells.  
 62 Spectra found in the primary vacuole at  $\lambda_{405}$  after 18 h are specified with a “v” after  
 63 the labels if another fluorescence was observed in the cytoplasm. Ellipses are  
 64 representative of qualitative differences with a  $p \leq 0.05$  at the PCA analysis of  
 65 normalized average spectra.

66

67

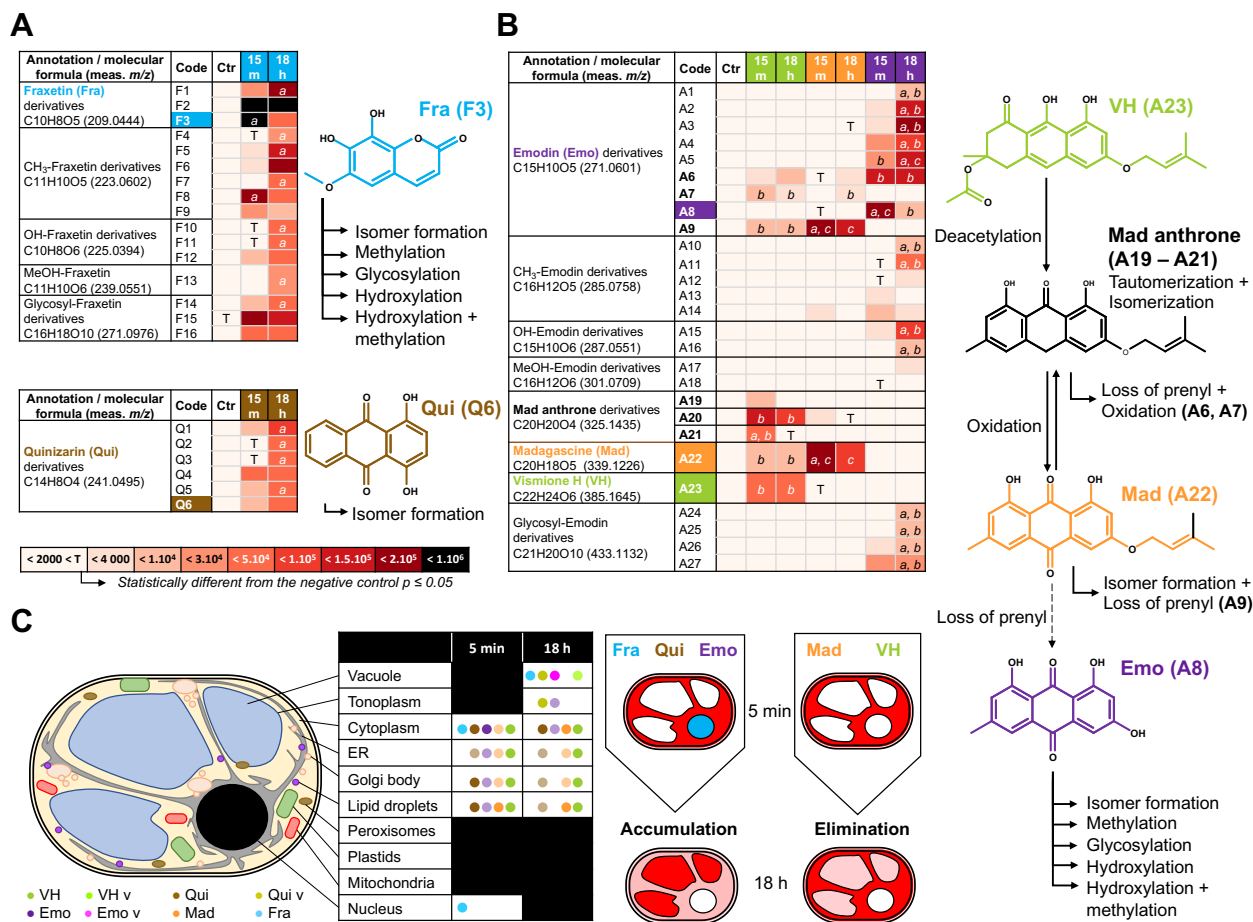

68

69 **Figure 6.** Hypothetical metabolization reactions according to non-targeted  
70 analysis of treated BY-2 cells.  
71 *m/z* of parent and daughter ions from references and related metabolites detected  
72 by UPLC-HRMS/MS analysis of methanolic extracts from BY-2 cells treated for 15  
73 min (15 m) and 18 h with **(A)** 50  $\mu$ M of fraxetin Fra (blue), **(B)** quinizarin Qui (brown)  
74 or, **(C)** vismione H VH (green), emodin Emo (purple) and madagascine Mad  
75 (orange). meas. *m/z* = measured *mass to charge ratio* of the most intense adduct  
76 detected. Proposed reactions such as hydroxylation (+ OH), methylation (+ CH<sub>3</sub>),  
77 hydroxylation/methylation (+ MeOH), glycosylation (+ Sugar) and loss of prenyl  
78 which may occur in the metabolization processes. The arrows indicate hypothetical  
79 reactions according to the references (colored label) and 54 annotations absent or  
80 with an area below the significant threshold in negative control samples (< 4000).  
81 Statistical analysis was performed on area from annotated metabolites (*N*=3) using  
82 Levene with Kruskal-Wallis tests followed by a Dunnett's post-hoc test. Significant  
83 differences (*p*  $\leq$  0.05) between area of metabolites from BY-2 cells treated 15 min  
84 and 18 h (a) or between treatments with anthranoids (b  $\neq$  c). **(D)** Conjunction of  
85 the fluorescence localization in BY-2 subcellular compartments observed by  
86 SImaging and the non-targeted metabolomic analysis proposing that Fra, Qui and  
87 Emo derivatives accumulate into the vacuole, while not prenylated anthranoids VH  
88 and Mad being mostly metabolized into other sub-cellular compartments.

89 **Table 1. Main photophysical characteristics of fluorescent species**

|                                                             | [C]<br>( $\mu\text{M}$ ) | $\lambda_{\text{abs}}$<br>(nm) | $\epsilon$<br>( $10^4 \text{ M}^{-1} \text{ cm}^{-1}$ ) | $\lambda_{\text{Ex}}$<br>(nm) | $\lambda_{\text{Em}}$<br>(nm) | $\Phi_{\text{F}}$<br>(%) | SI $\lambda_{\text{Em}}$<br>(nm) |
|-------------------------------------------------------------|--------------------------|--------------------------------|---------------------------------------------------------|-------------------------------|-------------------------------|--------------------------|----------------------------------|
| <b>Vismione H (LH<sub>2</sub>)<sup>a</sup></b>              | 2.6                      | 398                            | 1.1                                                     | 400                           | 481                           | 3.9                      | 503                              |
| <b>Vismione H (LB)<sup>b</sup></b>                          |                          | 403                            | 1.40                                                    | 402                           | 532                           | 31.0                     | 530                              |
| <b>Vismione H (LNH<sub>4</sub><sup>+</sup>)<sup>c</sup></b> |                          | 403                            | 1.93                                                    | 403                           | 533                           | 23.9                     | 530                              |
| <b>Vismione H-Ca (LCa)<sup>d</sup></b>                      |                          | 404                            | 1.36                                                    | 404                           | 549                           | 19.8                     | 548                              |
| <b>Vismione H-Mg (LMg)<sup>e</sup></b>                      |                          | 407                            | 1.40                                                    | 404                           | 550                           | 18.6                     | 548                              |
| <b>Vismione H-BSA (LBSA)<sup>f</sup></b>                    |                          | 404                            | 1.21                                                    | 404                           | 517                           | 23.5                     | 530                              |
| <b>Emodin (LH<sub>3</sub>)<sup>a</sup></b>                  | 5.55                     | 443                            | 1.68                                                    | 442                           | 575                           | 0.4                      | 565                              |
| <b>Madagascine (LH<sub>2</sub>)<sup>a</sup></b>             | 2.96                     | 437                            | 0.64                                                    | 446                           | 544                           | 4.8                      | 565                              |
| <b>Quinizarin (LH<sub>2</sub>)<sup>a</sup></b>              | 4.16                     | 480                            | 0.38                                                    | 479                           | 569                           | 15.1                     | 565                              |
| <b>Fraxetin (LB)<sup>b</sup></b>                            | 4.8                      | 366                            | 1.05                                                    | 367                           | 492                           | 1.1                      | 521                              |
| <b>Fraxetin (LNH<sub>4</sub><sup>+</sup>)<sup>c</sup></b>   |                          | 399                            | 0.87                                                    | 382                           | 481                           | 7.7                      | 521                              |
| <b>Fraxetin-BSA (LBSA)<sup>f</sup></b>                      |                          | 410                            | 2.04                                                    | 410                           | 490                           | 8.4                      | 503                              |

The absorption ( $\lambda_{\text{abs}}$ ), excitation ( $\lambda_{\text{Em}}$ ) and emission ( $\lambda_{\text{Em}}$ ) maxima obtained by spectrofluorimetry and SImaging (SI  $\lambda_{\text{Em}}$ ), the molar extinction coefficient ( $\epsilon$ ) and quantum yields determined for the pure compounds at different concentration ([C]) in model solutions. EtOH/H<sub>2</sub>O 1:1 v/v, 0.1 M NaCl with <sup>a</sup> 0.01 M HCl at pH 2, <sup>b</sup> 0.01 M Na<sub>2</sub>B<sub>4</sub>O<sub>7</sub> at pH 10, <sup>c</sup> 0.01 M NH<sub>4</sub>HCO<sub>3</sub> at pH 10, <sup>d</sup> 15 mM CaCl<sub>2</sub>, <sup>e</sup> 15 mM MgCl<sub>2</sub>, or <sup>f</sup> H<sub>2</sub>O containing 300  $\mu\text{M}$  BSA. The errors on  $\epsilon$  and  $\Phi_{\text{F}}$  are estimated to 10%, the errors on  $\lambda$  are estimated to  $\pm 1$  nm.

90

91

## Parsed Citations

- Batchelor-McAuley, C., Dimov, I.B., Aldous, L., and Compton, R.G. (2011). The electrochemistry of quinizarin revealed through its mediated reduction of oxygen. *Proc. Natl. Acad. Sci.* 108: 19891–19895.  
Google Scholar: [Author Only](#) [Title Only](#) [Author and Title](#)
- Binzel, M.L., Hess, F.D., Bressan, R.A., and Hasegawa, P.M. (1988). Intracellular Compartmentation of Ions in Salt Adapted Tobacco Cells. *Plant Physiol.* 86: 607–614.  
Google Scholar: [Author Only](#) [Title Only](#) [Author and Title](#)
- Cameron, D., Edmonds, J., and Raverty, W. (1976). Oxidation of emodin anthrone and stereochemistry of emodin bianthrone. *Aust. J. Chem.* 29: 1535.  
Google Scholar: [Author Only](#) [Title Only](#) [Author and Title](#)
- Carden, D.E., Walker, D.J., Flowers, T.J., and Miller, A.J. (2003). Single-Cell Measurements of the Contributions of Cytosolic Na<sup>+</sup> and K<sup>+</sup> to Salt Tolerance. *Plant Physiol.* 131: 676–683.  
Google Scholar: [Author Only](#) [Title Only](#) [Author and Title](#)
- Chiang, Y.-M., Szewczyk, E., Davidson, A.D., Entwistle, R., Keller, N.P., Wang, C.C.C., and Oakley, B.R. (2010). Characterization of the *Aspergillus nidulans* Monodictyphenone Gene Cluster. *Appl. Environ. Microbiol.* 76: 2067–2074.  
Google Scholar: [Author Only](#) [Title Only](#) [Author and Title](#)
- Conéjéro, G., Noirot, M., Talamond, P., and Verdeil, J.-L. (2014). Spectral analysis combined with advanced linear unmixing allows for histolocalization of phenolics in leaves of coffee trees. *Front. Plant Sci.* 5.  
Google Scholar: [Author Only](#) [Title Only](#) [Author and Title](#)
- Dong, X., Fu, J., Yin, X., Cao, S., Li, X., Lin, L., Huyiligeqi, and Ni, J. (2016). Emodin: A Review of its Pharmacology, Toxicity and Pharmacokinetics: Emodin: Pharmacology, Toxicity and Pharmacokinetics. *Phytother. Res.* 30: 1207–1218.  
Google Scholar: [Author Only](#) [Title Only](#) [Author and Title](#)
- Dudev, T. and Lim, C. (2004). Monodentate versus Bidentate Carboxylate Binding in Magnesium and Calcium Proteins: What Are the Basic Principles? *J. Phys. Chem. B* 108: 4546–4557.  
Google Scholar: [Author Only](#) [Title Only](#) [Author and Title](#)
- Duval, R., Cottet, K., Bland, M., Merckx, A., Houzé, S., Grellier, P., Lallemand, M.-C., and Michel, S. (2020). A Photoalkylative Fluorogenic Probe of Guttiferone A for Live Cell Imaging and Proteome Labeling in *Plasmodium falciparum*. *Molecules* 25: 5139.  
Google Scholar: [Author Only](#) [Title Only](#) [Author and Title](#)
- Duval, R. and Duplais, C. (2017). Fluorescent natural products as probes and tracers in biology. *Nat. Prod. Rep.* 34: 161–193.  
Google Scholar: [Author Only](#) [Title Only](#) [Author and Title](#)
- Elkazaz, S. and Jones, P.B. (2010). Photochemical Hydroxylation of 1-Methyl-9,10-anthraquinones: Synthesis of 9'-Hydroxyaloesaponarin II. *J. Org. Chem.* 75: 412–416.  
Google Scholar: [Author Only](#) [Title Only](#) [Author and Title](#)
- Fain, V.Ya., Zaitsev, B.E., and Ryabov, M.A. (2006). Tautomerism of anthraquinones: V. 1,5-Dihydroxy-9,10-anthraquinone and its substituted derivatives. *Russ. J. Org. Chem.* 42: 1662–1667.  
Google Scholar: [Author Only](#) [Title Only](#) [Author and Title](#)
- François, G., Steenackers, T., Assi, L.A., Steglich, W., Lamottke, K., Holenz, J., and Bringmann, G. (1999). Vismione H and structurally related anthranoid compounds of natural and synthetic origin as promising drugs against the human malaria parasite *Plasmodium falciparum*: structure-activity relationships. *Parasitol. Res.* 85: 582–588.  
Google Scholar: [Author Only](#) [Title Only](#) [Author and Title](#)
- Friedman, M. and Jürgens, H.S. (2000). Effect of pH on the Stability of Plant Phenolic Compounds. *J. Agric. Food Chem.* 48: 2101–2110.  
Google Scholar: [Author Only](#) [Title Only](#) [Author and Title](#)
- Fujii, T., Mishima, S., Tanaka, N., Kawachi, O., Kodaira, K., Nishikiori, H., and Kawai, Y. (1997). Absorption and fluorescence spectra of 9-anthrol and its chemical species in solution. *Res. Chem. Intermed.* 23: 829–839.  
Google Scholar: [Author Only](#) [Title Only](#) [Author and Title](#)
- Furumoto, T. and Jindai, A. (2008). Isolation and Photoisomerization of a New Anthraquinone from Hairy Root Cultures of *Sesamum indicum*. *Biosci. Biotechnol. Biochem.* 72: 2788–2790.  
Google Scholar: [Author Only](#) [Title Only](#) [Author and Title](#)
- Gallé, J.-B. (2015). **Pharmacochimie d'anthranoïdes issus du genre *Psorospermum* (Hypericaceae): isolement, activités antiparasitaires et synthèse d'analogues structuraux Jean-Baptiste Galle.**
- Gill, M. (2001). The Biosynthesis of Pigments in Basidiomycetes. *Aust. J. Chem.* 54: 721.  
Google Scholar: [Author Only](#) [Title Only](#) [Author and Title](#)
- Giusti, M.M. and Wrolstad, R.E. (2001). Characterization and Measurement of Anthocyanins by UV-Visible Spectroscopy. *Curr. Protoc. Food Anal. Chem.* 00: F1.2.1-F1.2.13.

- Google Scholar: [Author Only](#) [Title Only](#) [Author and Title](#)
- Guo, W., Chen, S., Hussain, N., Cong, Y., Liang, Z., and Chen, K. (2015). Magnesium stress signaling in plant: Just a beginning. *Plant Signal. Behav.* 10: e992287.  
Google Scholar: [Author Only](#) [Title Only](#) [Author and Title](#)
- Han, Y.-S., Van der Heijden, R., and Verpoorte, R. (2001). Biosynthesis of anthraquinones in cell cultures of the Rubiaceae. *Plant Cell Tissue Organ Cult.* 67: 201–220.  
Google Scholar: [Author Only](#) [Title Only](#) [Author and Title](#)
- Hemmerlin, A and Bach, T.J. (2000). Farnesol-induced cell death and stimulation of 3-hydroxy-3-methylglutaryl-coenzyme A reductase activity in tobacco cv bright yellow-2 cells. *Plant Physiol.* 123: 1257–1268.  
Google Scholar: [Author Only](#) [Title Only](#) [Author and Title](#)
- Heppler, P.K. (2005). Calcium: A Central Regulator of Plant Growth and Development. *Plant Cell* 17: 2142–2155.  
Google Scholar: [Author Only](#) [Title Only](#) [Author and Title](#)
- Hlasiwetz, H. and Grabowski, A. (1867). Mittheilungen aus dem chemischen Laboratorium in Innsbruck. I. Ueber die Carminsäure; *Ann. Chem. Pharm.* 141: 329–345.  
Google Scholar: [Author Only](#) [Title Only](#) [Author and Title](#)
- Kang, S.-H. et al. (2020). Genome-enabled discovery of anthraquinone biosynthesis in *Senna tora*. *Nat. Commun.* 11: 5875.  
Google Scholar: [Author Only](#) [Title Only](#) [Author and Title](#)
- Lefèvre, F., Fourmeau, J., Pottier, M., Bajot, A., Cornet, T., Abadía, J., Álvarez-Fernández, A., and Boutry, M. (2018). The *Nicotiana tabacum* ABC transporter NtPDR3 secretes O-methylated coumarins in response to iron deficiency. *J. Exp. Bot.* 69: 4419–4431.  
Google Scholar: [Author Only](#) [Title Only](#) [Author and Title](#)
- Martinière, A., Bassil, E., Jublanc, E., Alcon, C., Reguera, M., Sentenac, H., Blumwald, E., and Paris, N. (2013). In Vivo Intracellular pH Measurements in Tobacco and *Arabidopsis* Reveal an Unexpected pH Gradient in the Endomembrane System. *Plant Cell* 25: 4028–4043.  
Google Scholar: [Author Only](#) [Title Only](#) [Author and Title](#)
- Mazimba, O., Nana, F., and Singh, G.S. (2013). Xanthonones and Anthranoids from the Medicinal Plants of Africa. In *Medicinal Plant Research in Africa*, V. Kuete, ed (Elsevier), pp. 393–434.  
Google Scholar: [Author Only](#) [Title Only](#) [Author and Title](#)
- Nagata, T., Nemoto, Y., and Hasezawa, S. (1992). Tobacco BY-2 Cell Line as the "HeLa" Cell in the Cell Biology of Higher Plants. In *International Review of Cytology* (Elsevier), pp. 1–30.  
Google Scholar: [Author Only](#) [Title Only](#) [Author and Title](#)
- Osoba, O.A and Roberts, M.F. (1994). Methyltransferase activity in *Ailanthus altissima* cell suspension cultures. *Plant Cell Rep.* 13: 277–281.  
Google Scholar: [Author Only](#) [Title Only](#) [Author and Title](#)
- Robe, K. et al. (2021). Coumarin accumulation and trafficking in *Arabidopsis thaliana*: a complex and dynamic process. *New Phytol.* 229: 2062–2079.  
Google Scholar: [Author Only](#) [Title Only](#) [Author and Title](#)
- Rossi, S., Tabolacci, C., Lentini, A., Provenzano, B., Carlomosti, F., Frezzotti, S., and Beninati, S. (2010). Anthraquinones danthron and quinizarin exert antiproliferative and antimetastatic activity on murine B16-F10 melanoma cells. *Anticancer Res.* 30: 445–449.  
Google Scholar: [Author Only](#) [Title Only](#) [Author and Title](#)
- Sedaira, H., Idriss, K.A., Seleim, M.M., and Abdel-Aziz, M.S. (1998). Use of Quinizarin as a Spectrophotometric Reagent for MgO Content Analysis of Portland Cement and Cement Clinker. *Monatshefte Für Chem. Chem. Mon.* 129: 49–58.  
Google Scholar: [Author Only](#) [Title Only](#) [Author and Title](#)
- Shen, J., Zeng, Y., Zhuang, X., Sun, L., Yao, X., Pimpl, P., and Jiang, L. (2013). Organelle pH in the *Arabidopsis* Endomembrane System. *Mol. Plant* 6: 1419–1437.  
Google Scholar: [Author Only](#) [Title Only](#) [Author and Title](#)
- Srinivas, G., Babykutty, S., Sathiadevan, P.P., and Srinivas, P. (2007). Molecular mechanism of emodin action: Transition from laxative ingredient to an antitumor agent. *Med. Res. Rev.* 27: 591–608.  
Google Scholar: [Author Only](#) [Title Only](#) [Author and Title](#)
- Stringlis, I.A, de Jonge, R., and Pieterse, C.M.J. (2019). The Age of Coumarins in Plant–Microbe Interactions. *Plant Cell Physiol.* 60: 1405–1419.  
Google Scholar: [Author Only](#) [Title Only](#) [Author and Title](#)
- Talamond, P., Verdeil, J.-L., and Conéjéro, G. (2015). Secondary Metabolite Localization by Autofluorescence in Living Plant Cells. *Molecules* 20: 5024–5037.  
Google Scholar: [Author Only](#) [Title Only](#) [Author and Title](#)
- Tissier, A, Ziegler, J., and Vogt, T. (2014). Specialized Plant Metabolites: Diversity and Biosynthesis. In *Ecological Biochemistry*, G.-J.



**Krauss and D.H. Nies, eds (Wiley-VCH Verlag GmbH & Co. KGaA: Weinheim, Germany), pp. 14–37.**

Google Scholar: [Author Only](#) [Title Only](#) [Author and Title](#)

**Tsai, H.-H., Rodríguez-Celma, J., Lan, P., Wu, Y.-C., Vélez-Bermúdez, I.C., and Schmidt, W. (2018). Scopoletin 8-Hydroxylase-Mediated Fraxetin Production Is Crucial for Iron Mobilization. *Plant Physiol.* 177: 194–207.**

Google Scholar: [Author Only](#) [Title Only](#) [Author and Title](#)

**Verebova, V., Belej, D., Joniova, J., Jurasekova, Z., Miskovsky, P., Kozar, T., Horvath, D., Stanicova, J., and Huntosova, V. (2016). Deeper insights into the drug defense of glioma cells against hydrophobic molecules. *Int. J. Pharm.* 503: 56–67.**

Google Scholar: [Author Only](#) [Title Only](#) [Author and Title](#)

**Villette, C., Maurer, L., Wanko, A., and Heintz, D. (2019). Xenobiotics metabolization in *Salix alba* leaves uncovered by mass spectrometry imaging. *Metabolomics* 15: 122.**

Google Scholar: [Author Only](#) [Title Only](#) [Author and Title](#)

**Villette, C., Zumsteg, J., Schaller, H., and Heintz, D. (2018). Non-targeted metabolic profiling of BW312 *Hordeum vulgare* semi dwarf mutant using UHPLC coupled to QTOF high resolution mass spectrometry. *Sci. Rep.* 8.**

Google Scholar: [Author Only](#) [Title Only](#) [Author and Title](#)

**Waters, B.M. (2011). Moving magnesium in plant cells: Commentary. *New Phytol.* 190: 510–513.**

Google Scholar: [Author Only](#) [Title Only](#) [Author and Title](#)

**Yamamoto, H., Tabata, M., and Leistner, E. (1987). Cytological changes associated with induction of anthraquinone synthesis in photoautotrophic cell suspension cultures of *Morinda lucida*. *Plant Cell Rep.* 6: 187–190.**

Google Scholar: [Author Only](#) [Title Only](#) [Author and Title](#)
